# Supplementary material for: Post-Little Ice Age Glacier Recession in the North-Chuya Ridge and Dynamics of the Bolshoi Maashei Glacier, Altai
Source: MDPI journal article supplement (doi:10.3390/rs15082186), 2023-04-20
Supplement: s1 [file s1]

Table S2. Glacier inventory of North-Chuya ridge for 2000. Designations correspond to those in the table S1. The numerical numbers of glaciers correspond to the numbering of modern glaciers, the L-index denotes glaciers that existed during the Little Ice Age, but disappeared by 2021, the M-index denotes glaciers that existed during in 2000, but dis-appeared by 2021.

| N                                                                                                                                                                                                                      | Name  | $\lambda$ , ° | $\varphi$ , ° | S, km <sup>2</sup> | Morphologica<br>l type | Z <sub>1</sub> | Z <sub>2</sub> | ELA  | $a_{max}$ , ° | $a_{av}$ , ° | S <sub>3D</sub> , km | E, °    |
|------------------------------------------------------------------------------------------------------------------------------------------------------------------------------------------------------------------------|-------|---------------|---------------|--------------------|------------------------|----------------|----------------|------|---------------|--------------|----------------------|---------|
| Jelo river basin                                                                                                                                                                                                       |       |               |               |                    |                        |                |                |      |               |              |                      |         |
| 1                                                                                                                                                                                                                      |       | 87.73         | 50.01         | 0.58±0.06          | cirque                 | 2826           | 3181           | 2971 | 50.2          | 24.0         | 0.66                 | E, 79   |
| 2                                                                                                                                                                                                                      |       | 87.72         | 50.01         | 0.70±0.07          | cirque-valley          | 2776           | 3327           | 3016 | 65.6          | 23.3         | 0.80                 | NE, 68  |
| 3                                                                                                                                                                                                                      | Jelo  | 87.71         | 50.03         | 7.06±0.44          | valley                 | 2694           | 3688           | 3157 | 58.9          | 16.5         | 8.00                 | E, 101  |
| 4                                                                                                                                                                                                                      |       | 87.72         | 50.05         | 0.06±0.02          | hanging                | 3279           | 3453           | 3352 | 39.7          | 28.9         | 0.06                 | SW, 214 |
| 5                                                                                                                                                                                                                      |       | 87.75         | 50.04         | 0.53±0.10          | slope                  | 3203           | 3660           | 3507 | 42.5          | 18.4         | 0.57                 | SE, 158 |
| 6                                                                                                                                                                                                                      |       | 87.76         | 50.04         | 0.19±0.04          | cirque                 | 3066           | 3391           | 3180 | 64.9          | 26.5         | 0.22                 | E, 96   |
| 7                                                                                                                                                                                                                      |       | 87.77         | 50.05         | 0.02±0.01          | slope                  | 3313           | 3334           | 3323 | 21.4          | 9.1          | 0.02                 | E, 84   |
| 8                                                                                                                                                                                                                      | Kupol | 87.79         | 50.04         | 1.28±0.15          | flat summit            | 3159           | 3551           | 3406 | 28.2          | 14.9         | 1.33                 | S, 152  |
| 9                                                                                                                                                                                                                      |       | 87.80         | 50.02         | 0.14±0.04          | cirque-<br>hanging     | 3143           | 3309           | 3247 | 53.1          | 22.5         | 0.15                 | E, 84   |
| 10                                                                                                                                                                                                                     |       | 87.80         | 50.02         | 0.11±0.02          | cirque-<br>hanging     | 2989           | 3252           | 3086 | 43.8          | 28.2         | 0.13                 | NE, 56  |
| L4                                                                                                                                                                                                                     |       | 87.83         | 50.05         | 0.13±0.04          | flat summit            | 3179           | 3318           | 3247 | 22.9          | 13.2         | 0.13                 | NE, 51  |
| In total in the basin of the Jelo river 11 glaciers with total area of 10.78±0.97 km <sup>2</sup> have been reconstructed . minimal altitude is 2694 m. maximal altitude is 3688 m area weighted average ELA is 3150 m |       |               |               |                    |                        |                |                |      |               |              |                      |         |
| Tete river basin                                                                                                                                                                                                       |       |               |               |                    |                        |                |                |      |               |              |                      |         |
| 11                                                                                                                                                                                                                     |       | 87.86         | 50.05         | 0.39±0.07          | flat summit            | 3285           | 3450           | 3367 | 31.5          | 12.5         | 0.40                 | N, 23   |
| 12                                                                                                                                                                                                                     |       | 87.88         | 50.05         | 0.10±0.03          | flat summit            | 3253           | 3384           | 3353 | 46.2          | 15.4         | 0.10                 | N, 28   |
| 13                                                                                                                                                                                                                     |       | 87.89         | 50.05         | 0.38±0.05          | cirque                 | 2955           | 3357           | 3132 | 59.5          | 25.0         | 0.44                 | N, 28   |
| 14                                                                                                                                                                                                                     |       | 87.87         | 50.06         | 0.07±0.02          | cirque-<br>hanging     | 3124           | 3330           | 3250 | 46.4          | 32.3         | 0.08                 | NE, 62  |
| 15                                                                                                                                                                                                                     | Tete  | 87.81         | 50.05         | 0.74±0.12          | valley                 | 2804           | 3471           | 3092 | 61.9          | 27.4         | 0.89                 | NE, 51  |
| 16                                                                                                                                                                                                                     |       | 87.80         | 50.06         | 0.96±0.10          | cirque                 | 2883           | 3551           | 3184 | 53.3          | 20.9         | 1.05                 | NE, 39  |
| M1                                                                                                                                                                                                                     |       | 87.88         | 50.05         | 0.09±0.03          | hanging                | 2928           | 3327           | 3114 | 50.1          | 33.5         | 0.11                 | N, 349  |

In total, in the basin of the Tete river 7 glaciers with total area of 2.72±0.41 km<sup>2</sup> have been reconstructed. minimal altitude is 2804 m, maximal altitude is 3551 m. area weighted average ELA is 3158 m

| Aktru river basin |       |       |           |               |      |      |      |      |      |              |
|-------------------|-------|-------|-----------|---------------|------|------|------|------|------|--------------|
| 17                | 87.79 | 50.05 | 0.84±0.07 | slope         | 3055 | 3551 | 3340 | 35.1 | 18.5 | 0.89 NW, 343 |
| 18                | 87.78 | 50.05 | 0.74±0.08 | cirque        | 2627 | 3516 | 3219 | 57.0 | 25.0 | 0.86 N, 6    |
| 19 Malyi Aktru    | 87.75 | 50.05 | 2.90±0.21 | valley        | 2255 | 3709 | 3238 | 62.8 | 20.6 | 3.20 NE, 34  |
| 20                | 87.75 | 50.06 | 0.04±0.02 | hanging       | 3294 | 3521 | 3422 | 47.5 | 33.9 | 0.05 N, 349  |
| 21                | 87.75 | 50.06 | 0.05±0.02 | hanging       | 3278 | 3521 | 3436 | 47.0 | 34.0 | 0.06 NW, 338 |
| 22 Pravyi Aktru   | 87.71 | 50.06 | 4.90±0.54 | valley        | 2460 | 3727 | 3188 | 62.3 | 25.6 | 5.94 NE, 56  |
| 23                | 87.74 | 50.05 | 0.02±0.01 | hanging       | 3319 | 3515 | 3461 | 57.0 | 36.6 | 0.03 N, 0    |
| 24                | 87.71 | 50.07 | 0.16±0.03 | slope         | 3168 | 3430 | 3266 | 42.2 | 19.3 | 0.17 SE, 107 |
| 25 Levyi Aktru    | 87.70 | 50.08 | 5.48±0.34 | valley        | 2617 | 3970 | 3278 | 73.0 | 24.4 | 6.64 E, 73   |
|                   |       |       |           | cirque-       |      |      |      |      |      |              |
| 26                | 87.72 | 50.09 | 0.20±0.03 | hanging       | 3224 | 3566 | 3340 | 39.9 | 25.3 | 0.22 E, 79   |
| 27 Kysyl-Tash     | 87.74 | 50.09 | 0.44±0.08 | cirque        | 2785 | 3442 | 3076 | 61.2 | 29.4 | 0.53 N, 17   |
|                   |       |       |           | cirque-       |      |      |      |      |      |              |
| 28                | 87.71 | 50.09 | 0.35±0.08 | hanging       | 2874 | 3551 | 3121 | 65.8 | 33.9 | 0.48 N, 11   |
| 29                | 87.70 | 50.09 | 0.16±0.03 | hanging       | 3213 | 3560 | 3378 | 61.3 | 37.6 | 0.22 NE, 17  |
| 30 Yan-Karasu     | 87.70 | 50.10 | 1.32±0.24 | valley        | 2792 | 3960 | 3303 | 68.7 | 28.3 | 1.63 E, 73   |
| 31 Malyi Korumdu  | 87.71 | 50.11 | 0.41±0.09 | valley        | 2651 | 3715 | 3112 | 44.1 | 28.3 | 0.48 NE, 45  |
| 32 Korumdu        | 87.68 | 50.11 | 5.70±0.72 | valley        | 2299 | 3964 | 3252 | 65.1 | 30.8 | 8.29 NE, 56  |
| 33                | 87.67 | 50.13 | 0.85±0.16 | cirque-valley | 2638 | 3967 | 3165 | 55.0 | 33.8 | 1.11 NE, 45  |
| L23               | 87.67 | 50.14 | 0.12±0.03 | cirque        | 2911 | 3200 | 3037 | 41.3 | 25.8 | 0.13 NE, 56  |
| 34 Kurkurek       | 87.65 | 50.14 | 2.14±0.19 | valley        | 2495 | 3967 | 3225 | 64.8 | 29.4 | 2.72 N, 23   |
| 35                | 87.63 | 50.14 | 0.52±0.07 | cirque-valley | 2783 | 3664 | 3264 | 57.2 | 35.2 | 0.67 NE, 56  |
| 36                | 87.62 | 50.15 | 0.99±0.14 | cirque-valley | 2827 | 3624 | 3196 | 64.1 | 27.1 | 1.25 N, 0    |
| 37                | 87.60 | 50.15 | 0.38±0.05 | cirque        | 2845 | 3485 | 3094 | 66.9 | 26.4 | 0.45 N, 11   |

In total, in the basin of the Aktru river 22 glaciers with total area of 28.70±3.20 km<sup>2</sup> are reconstructed, minimal altitude is 2255 m, maximal altitude is 3970 m, area weighted average ELA is 3093

| Maashei river basin |       |       |           |             |      |      |      |      |      |              |
|---------------------|-------|-------|-----------|-------------|------|------|------|------|------|--------------|
| 38                  | 87.62 | 50.14 | 0.16±0.04 | flat summit | 3446 | 3626 | 3550 | 31.6 | 12.6 | 0.16 SW, 242 |
| 39                  | 87.63 | 50.12 | 2.13±0.19 | valley      | 2656 | 3909 | 3464 | 54.4 | 27.7 | 2.71 NW, 298 |
| 40                  | 87.64 | 50.12 | 1.36±0.17 | cirque      | 3068 | 3965 | 3607 | 50.2 | 30.2 | 1.82 S, 152  |

|        |                 |       |       |           |               |      |      |             |      |      |      |         |
|--------|-----------------|-------|-------|-----------|---------------|------|------|-------------|------|------|------|---------|
| 41     |                 | 87.66 | 50.11 | 0.19±0.05 | cirque-valley | 3198 | 3792 | 3615        | 50.4 | 30.6 | 0.23 | W, 259  |
| 42     | Pravyi Maashei  | 87.65 | 50.10 | 3.20±0.25 | valley        | 2578 | 3952 | 3352        | 68.7 | 27.8 | 4.01 | W, 270  |
| 43     |                 | 87.63 | 50.10 | 0.13±0.03 | hanging       | 2991 | 3567 | 3415        | 56.5 | 33.1 | 0.16 | NW, 321 |
| 44     |                 | 87.66 | 50.09 | 0.11±0.04 | hanging       | 3259 | 3946 | 3541        | 70.6 | 40.9 | 0.15 | S, 197  |
| 45     |                 | 87.67 | 50.09 | 0.33±0.05 | slope         | 3252 | 3963 | 3716        | 75.4 | 39.7 | 0.50 | SW, 197 |
| 46     |                 | 87.66 | 50.08 | 5.21±0.34 | valley        | 2646 | 3867 | 3172        | 69.9 | 23.4 | 6.27 | NW, 304 |
| 47     | Bolshoi Maashei | 87.61 | 50.06 | 6.30±0.35 | valley        | 2205 | 4107 | <b>2858</b> | 69.6 | 19.8 | 7.14 | N, 17   |
| 48     |                 | 87.59 | 50.07 | 2.15±0.19 | valley        | 2602 | 4085 | 3253        | 67.8 | 33.1 | 2.93 | NE, 28  |
| 49     |                 | 87.57 | 50.08 | 0.32±0.06 | valley        | 2660 | 3676 | 3169        | 55.2 | 35.8 | 0.42 | N, 354  |
| 50     |                 | 87.57 | 50.08 | 0.29±0.06 | valley        | 2641 | 3676 | 3155        | 55.2 | 36.0 | 0.37 | N, 349  |
| 51     | Levyi Maashei   | 87.55 | 50.07 | 3.88±0.26 | valley        | 2653 | 4110 | 3213        | 64.6 | 28.6 | 4.98 | N, 23   |
| 52     |                 | 87.54 | 50.08 | 0.28±0.06 | cirque        | 2833 | 3382 | 3055        | 58.2 | 29.0 | 0.34 | NE, 68  |
| 53     |                 | 87.53 | 50.09 | 0.91±0.08 | cirque        | 2879 | 3447 | 3078        | 55.2 | 21.1 | 1.02 | E, 107  |
| 54     |                 | 87.53 | 50.10 | 0.02±0.01 | hanging       | 3258 | 3374 | 3344        | 48.8 | 30.6 | 0.03 | S, 191  |
| 55     |                 | 87.55 | 50.10 | 0.14±0.03 | hanging       | 3113 | 3345 | 3211        | 42.7 | 23.9 | 0.16 | W, 253  |
| 56     |                 | 87.55 | 50.10 | 0.07±0.02 | hanging       | 3094 | 3316 | 3204        | 53.4 | 28.5 | 0.09 | E, 62   |
| 57     |                 | 87.55 | 50.10 | 0.21±0.03 | hanging       | 3101 | 3345 | 3224        | 47.6 | 25.2 | 0.24 | NW, 304 |
| 58     |                 | 87.54 | 50.10 | 0.04±0.02 | hanging       | 3063 | 3223 | 3162        | 33.2 | 22.4 | 0.04 | N, 6    |
| M2     |                 | 87.54 | 50.10 | 0.03±0.01 | hanging       | 3080 | 3270 | 3189        | 53.3 | 30.6 | 0.03 | NE, 45  |
| 59     |                 | 87.53 | 50.10 | 0.12±0.03 | hanging       | 3136 | 3373 | 3302        | 51.8 | 30.1 | 0.14 | NE, 51  |
| M3     |                 | 87.53 | 50.10 | 0.05±0.02 | hanging       | 2964 | 3314 | 3166        | 51.3 | 40.2 | 0.06 | N, 0    |
| 60     |                 | 87.53 | 50.12 | 0.03±0.01 | hanging       | 2984 | 3242 | 3151        | 53.6 | 34.5 | 0.04 | N, 343  |
| 61     |                 | 87.52 | 50.11 | 0.23±0.04 | hanging       | 3065 | 3514 | 3339        | 52.1 | 34.8 | 0.28 | N, 11   |
| 62     |                 | 87.51 | 50.12 | 0.60±0.09 | cirque-valley | 2814 | 3515 | 3070        | 56.9 | 29.6 | 0.73 | NE, 0   |
| 63     |                 | 87.50 | 50.12 | 0.65±0.08 | cirque        | 2885 | 3519 | 3108        | 62.3 | 24.4 | 0.75 | E, 68   |
| 64     |                 | 87.53 | 50.14 | 0.20±0.04 | cirque        | 2859 | 3251 | 3022        | 55.1 | 35.9 | 0.25 | NE, 34  |
| 65     |                 | 87.53 | 50.15 | 0.49±0.09 | cirque        | 2655 | 3527 | 3077        | 59.1 | 33.6 | 0.64 | N, 343  |
| 66     |                 | 87.52 | 50.15 | 0.14±0.03 | hanging       | 3019 | 3529 | 3298        | 55.0 | 42.1 | 0.19 | N, 6    |
| 67     |                 | 87.52 | 50.15 | 0.06±0.02 | hanging       | 2943 | 3378 | 3216        | 65.0 | 40.7 | 0.08 | N, 28   |
| 68     |                 | 87.51 | 50.16 | 0.24±0.06 | cirque        | 2788 | 3313 | 3017        | 52.3 | 28.5 | 0.29 | NE, 34  |
| 69     |                 | 87.51 | 50.14 | 0.87±0.09 | valley        | 2741 | 3561 | 3083        | 61.0 | 27.6 | 1.04 | NW, 332 |
| 70, 71 |                 | 87.50 | 50.14 | 2.20±0.20 | valley        | 2598 | 3661 | 3062        | 61.0 | 25.0 | 2.62 | N, 354  |

|    |       |       |           |         |      |      |      |      |      |      |       |
|----|-------|-------|-----------|---------|------|------|------|------|------|------|-------|
| 72 | 87.48 | 50.14 | 0.89±0.16 | cirque  | 2637 | 3418 | 3036 | 56.4 | 31.5 | 1.23 | N, 17 |
| 73 | 87.47 | 50.15 | 0.09±0.04 | hanging | 2751 | 3220 | 2977 | 53.2 | 36.7 | 0.11 | N, 0  |

In total, in the basin of the Maashei 37glaciers with total area of 34.32±3.32 km<sup>2</sup> are reconstructed, minimal altitude 2205 m, maximal altitude 4110 m, area weighted average ELA is 3037 m,

#### Shavly river basin

|        |       |       |           |               |      |      |      |      |      |      |         |
|--------|-------|-------|-----------|---------------|------|------|------|------|------|------|---------|
| 74     | 87.46 | 50.17 | 0.21±0.03 | cirque        | 2964 | 3141 | 3033 | 42.2 | 16.0 | 0.22 | N, 342  |
| 75     | 87.45 | 50.17 | 0.25±0.06 | cirque        | 2675 | 3247 | 2927 | 66.5 | 30.9 | 0.31 | N, 343  |
| 76     | 87.46 | 50.15 | 0.98±0.10 | cirque-valley | 2760 | 3418 | 3035 | 51.5 | 22.5 | 1.11 | N,0     |
| 77-79  | 87.44 | 50.15 | 0.53±0.07 | hanging       | 2672 | 3385 | 3136 | 58.3 | 35.3 | 0.68 | N, 354  |
| 80     | 87.43 | 50.14 | 0.07±0.02 | hanging       | 3029 | 3224 | 3133 | 45.5 | 28.7 | 0.08 | N, 0    |
| 81, 82 | 87.43 | 50.15 | 0.15±0.04 | hanging       | 2847 | 3209 | 3076 | 41.8 | 27.8 | 0.18 | N, 6    |
| 83     | 87.48 | 50.13 | 0.07±0.03 | hanging       | 3235 | 3667 | 3517 | 51.9 | 35.9 | 0.09 | NW, 309 |
| 84     | 87.48 | 50.13 | 0.07±0.02 | hanging       | 3106 | 3573 | 3409 | 55.3 | 39.0 | 0.09 | W, 293  |
| 85     | 87.48 | 50.12 | 0.01±0.01 | hanging       | 3440 | 3560 | 3495 | 43.5 | 37.7 | 0.01 | SW, 208 |
| 86     | 87.51 | 50.10 | 2.25±0.25 | cirque-valley | 2652 | 3706 | 3113 | 71.4 | 29.0 | 3.16 | N, 11   |
| 87     | 87.49 | 50.10 | 0.20±0.04 | hanging       | 3047 | 3716 | 3452 | 70.4 | 43.0 | 0.29 | NE, 34  |
| 88     | 87.48 | 50.10 | 0.20±0.03 | hanging       | 3175 | 3664 | 3510 | 57.0 | 32.3 | 0.24 | NE, 34  |
| 89     | 87.47 | 50.10 | 0.12±0.02 | hanging       | 3298 | 3721 | 3491 | 57.8 | 34.7 | 0.15 | NE, 17  |
| 90     | 87.47 | 50.10 | 0.20±0.05 | hanging       | 2821 | 3714 | 3464 | 69.9 | 43.0 | 0.31 | NW, 332 |
| L41    | 87.46 | 50.10 | 0.01±0.01 | hanging       | 3415 | 3600 | 3518 | 63.6 | 55.9 | 0.01 | W,236   |
| L42    | 87.47 | 50.10 | 0.01±0.01 | hanging       | 3530 | 3626 | 3595 | 47.4 | 28.5 | 0.01 | SW,236  |
| 91     | 87.47 | 50.10 | 0.10±0.02 | hanging       | 3539 | 3721 | 3629 | 54.3 | 27.5 | 0.12 | S,163   |
| 92     | 87.52 | 50.09 | 0.03±0.01 | slope         | 3362 | 3447 | 3404 | 41.5 | 23.7 | 0.04 | SW,259  |
| 93     | 87.52 | 50.08 | 0.11±0.02 | hanging       | 3111 | 3336 | 3238 | 49.1 | 22.7 | 0.12 | W,287   |
| 94     | 87.52 | 50.08 | 0.05±0.02 | hanging       | 3213 | 3334 | 3261 | 36.0 | 21.6 | 0.05 | S, 169  |
| 95     | 87.53 | 50.08 | 0.35±0.06 | cirque        | 2941 | 3490 | 3246 | 52.3 | 27.8 | 0.41 | W,276   |
| 96     | 87.52 | 50.07 | 0.95±0.11 | cirque-valley | 2692 | 3528 | 3033 | 68.2 | 28.9 | 1.17 | NW,332  |
| 97, 98 | 87.50 | 50.07 | 0.78±0.12 | hanging       | 2637 | 3798 | 3305 | 66.7 | 35.6 | 1.04 | N, 354  |
| 99     | 87.49 | 50.07 | 0.17±0.04 | hanging       | 2877 | 3530 | 3289 | 62.5 | 40.5 | 0.25 | N,11    |
| 100    | 87.50 | 50.07 | 0.07±0.02 | hanging       | 3536 | 3803 | 3686 | 43.7 | 32.8 | 0.08 | W,253   |
| 101    | 87.50 | 50.06 | 0.01±0.01 | hanging       | 3348 | 3510 | 3458 | 46.3 | 33.5 | 0.02 | W,264   |
| 102    | 87.48 | 50.05 | 2.03±0.22 | valley        | 2562 | 3489 | 2967 | 59.1 | 21.9 | 2.35 | N,349   |

|     |       |       |           |               |      |      |      |      |      |      |        |
|-----|-------|-------|-----------|---------------|------|------|------|------|------|------|--------|
| 103 | 87.46 | 50.05 | 1.37±0.20 | cirque        | 2472 | 3691 | 2948 | 68.5 | 30.7 | 1.87 | N,349  |
| 104 | 87.44 | 50.05 | 2.78±0.23 | valley        | 2357 | 3674 | 3050 | 66.6 | 28.2 | 3.41 | N,23   |
| 105 | 87.43 | 50.05 | 0.04±0.01 | hanging       | 2981 | 3202 | 3066 | 50.1 | 33.6 | 0.05 | NE,56  |
| 106 | 87.42 | 50.06 | 0.68±0.16 | cirque        | 2683 | 3411 | 2992 | 64.1 | 29.7 | 0.91 | NE,51  |
| 107 | 87.41 | 50.06 | 0.03±0.01 | hanging       | 3169 | 3254 | 3214 | 34.5 | 19.0 | 0.03 | S,169  |
| 108 | 87.42 | 50.08 | 0.08±0.02 | cirque        | 2874 | 3141 | 3005 | 52.6 | 26.6 | 0.10 | N,343  |
| 109 | 87.42 | 50.07 | 0.87±0.12 | valley        | 2512 | 3251 | 2966 | 59.1 | 19.4 | 0.99 | N,34   |
| 110 | 87.41 | 50.06 | 0.08±0.02 | hanging       | 2964 | 3251 | 3140 | 49.4 | 32.7 | 0.10 | W,293  |
| 111 | 87.40 | 50.07 | 2.35±0.23 | valley        | 2266 | 3642 | 3009 | 63.7 | 27.1 | 2.78 | NE, 34 |
| 112 | 87.38 | 50.07 | 0.15±0.03 | flat summit   | 3034 | 3435 | 3296 | 53.2 | 32.1 | 0.18 | NE,84  |
| 113 | 87.38 | 50.08 | 0.06±0.02 | hanging       | 3051 | 3356 | 3265 | 56.2 | 30.2 | 0.08 | NE, 62 |
| 114 | 87.38 | 50.09 | 0.07±0.02 | hanging       | 2920 | 3268 | 3134 | 62.6 | 36.0 | 0.09 | N,23   |
| 115 | 87.37 | 50.07 | 0.48±0.06 | cirque-valley | 2771 | 3322 | 3003 | 51.5 | 26.8 | 0.56 | NW,304 |
| 116 | 87.38 | 50.07 | 1.21±0.13 | valley        | 2663 | 3609 | 3038 | 54.3 | 22.9 | 1.36 | N,338  |
| 117 | 87.35 | 50.08 | 0.29±0.04 | cirque        | 2992 | 3433 | 3218 | 66.7 | 36.0 | 0.36 | NE,51  |

In total, in the basin of the Shavly river 42 glaciers are reconstructed with the total area of 20.51±2.74 km<sup>2</sup>, minimal altitude 2266 m, maximal altitude 3803 m, area weighted average ELA 3009 m

#### Yungur river basin

|     |       |       |           |               |      |      |      |      |      |      |         |
|-----|-------|-------|-----------|---------------|------|------|------|------|------|------|---------|
| 118 | 87.36 | 50.06 | 1.00±0.11 | cirque-valley | 2697 | 3472 | 3015 | 67.0 | 28.6 | 1.24 | NW,338  |
| 119 | 87.36 | 50.06 | 0.15±0.03 | hanging       | 2858 | 3433 | 3215 | 61.7 | 38.2 | 0.21 | N,11    |
| 120 | 87.35 | 50.06 | 0.08±0.02 | hanging       | 2889 | 3433 | 3244 | 59.9 | 34.3 | 0.11 | NW,354  |
| 121 | 87.35 | 50.06 | 0.05±0.02 | hanging       | 2906 | 3347 | 3222 | 56.5 | 34.3 | 0.06 | N, 17   |
| L79 | 87.37 | 50.05 | 0.10±0.02 | cirque        | 2993 | 3139 | 3045 | 46.3 | 20.4 | 0.11 | SE, 101 |
| 122 | 87.38 | 50.05 | 0.26±0.04 | cirque        | 2925 | 3171 | 3053 | 40.5 | 24.4 | 0.29 | SE, 169 |
| 123 | 87.39 | 50.05 | 0.38±0.05 | cirque        | 2965 | 3336 | 3075 | 47.8 | 22.4 | 0.42 | SW, 203 |
| 124 | 87.40 | 50.05 | 0.90±0.08 | cirque-valley | 2820 | 3393 | 3095 | 56.8 | 21.2 | 0.99 | W, 293  |
| 125 | 87.43 | 50.03 | 0.96±0.08 | cirque-valley | 2863 | 3322 | 3068 | 64.5 | 18.9 | 1.05 | NW, 281 |
| 126 | 87.42 | 50.03 | 0.09±0.02 | hanging       | 3060 | 3350 | 3213 | 58.9 | 38.0 | 0.12 | NW, 338 |
| 127 | 87.40 | 49.99 | 0.31±0.05 | cirque        | 2725 | 3220 | 2955 | 58.8 | 27.5 | 0.36 | N, 6    |
| 128 | 87.39 | 49.99 | 0.03±0.01 | hanging       | 2997 | 3129 | 3080 | 48.4 | 26.5 | 0.03 | N, 6    |
| 129 | 87.38 | 49.97 | 0.05±0.02 | hanging       | 3012 | 3223 | 3151 | 56.7 | 23.4 | 0.06 | NE, 23  |
| 130 | 87.37 | 49.98 | 0.20±0.03 | hanging       | 2660 | 3356 | 3085 | 62.1 | 36.8 | 0.26 | N, 354  |

|      |       |       |           |               |      |      |      |      |      |      |        |
|------|-------|-------|-----------|---------------|------|------|------|------|------|------|--------|
| 131  | 87.34 | 49.97 | 0.03±0.01 | hanging       | 2947 | 3233 | 3126 | 65.3 | 41.8 | 0.05 | N, 349 |
| 132  | 87.33 | 49.97 | 0.07±0.02 | hanging       | 2924 | 3270 | 3170 | 58.6 | 31.7 | 0.08 | N, 0   |
| 133  | 87.33 | 49.97 | 0.04±0.01 | hanging       | 2960 | 3369 | 3202 | 54.4 | 43.5 | 0.05 | N, 0   |
| 134  | 87.32 | 49.97 | 0.19±0.04 | cirque        | 2829 | 3222 | 2967 | 65.6 | 42.4 | 0.28 | N, 354 |
| 135  | 87.31 | 49.97 | 0.25±0.06 | hanging       | 2725 | 3253 | 2977 | 58.8 | 32.0 | 0.31 | N, 0   |
| 136  | 87.29 | 49.97 | 0.45±0.07 | cirque-valley | 2794 | 3248 | 3048 | 54.5 | 22.4 | 0.50 | N, 338 |
| 137  | 87.28 | 49.96 | 0.03±0.01 | hanging       | 2980 | 3157 | 3085 | 46.3 | 29.4 | 0.03 | N, 343 |
| 138  | 87.27 | 49.96 | 0.03±0.01 | hanging       | 3057 | 3209 | 3146 | 45.7 | 34.7 | 0.03 | NE, 28 |
| 139  | 87.26 | 49.96 | 0.03±0.01 | hanging       | 2922 | 3199 | 3126 | 63.6 | 41.7 | 0.04 | NE, 17 |
| 140  | 87.25 | 49.96 | 0.07±0.02 | hanging       | 2986 | 3404 | 3241 | 63.5 | 41.0 | 0.10 | N, 354 |
| 141  | 87.24 | 49.96 | 0.15±0.04 | cirque        | 2664 | 3293 | 2978 | 51.9 | 35.4 | 0.18 | N, 338 |
| 142  | 87.23 | 49.96 | 0.19±0.06 | cirque        | 2752 | 3378 | 3010 | 61.2 | 33.6 | 0.24 | N, 354 |
| 143  | 87.22 | 49.96 | 0.74±0.11 | valley        | 2664 | 3346 | 2937 | 56.2 | 24.8 | 0.85 | N, 349 |
| 144  | 87.21 | 49.96 | 0.42±0.07 | valley        | 2581 | 3290 | 2857 | 75.7 | 28.5 | 0.51 | N, 11  |
| 145  | 87.20 | 49.96 | 0.10±0.02 | hanging       | 3042 | 3278 | 3177 | 60.4 | 34.7 | 0.12 | E, 68  |
| 146  | 87.20 | 49.97 | 0.08±0.02 | hanging       | 2839 | 3237 | 3077 | 47.4 | 36.8 | 0.10 | N, 17  |
| 147, |       |       |           |               |      |      |      |      |      |      |        |
| 148  | 87.18 | 49.96 | 0.15±0.04 | hanging       | 2823 | 3308 | 3055 | 65.1 | 36.3 | 0.20 | NE, 45 |
| 149, |       |       |           |               |      |      |      |      |      |      |        |
| 150  | 87.17 | 49.96 | 0.13±0.03 | hanging       | 2980 | 3525 | 3298 | 75.7 | 50.5 | 0.24 | E, 34  |
| 151  | 87.17 | 49.96 | 0.07±0.02 | hanging       | 3035 | 3519 | 3329 | 61.8 | 38.4 | 0.09 | N, 17  |
| 152  | 87.17 | 49.97 | 0.03±0.02 | hanging       | 2945 | 3348 | 3109 | 70.8 | 54.4 | 0.06 | NE, 51 |
| 153  | 87.15 | 49.98 | 0.05±0.01 | hanging       | 2986 | 3153 | 3086 | 40.5 | 24.8 | 0.05 | N, 354 |
| 154  | 87.15 | 49.98 | 0.05±0.02 | hanging       | 2980 | 3247 | 3116 | 56.5 | 30.4 | 0.06 | N, 0   |
| 155, |       |       |           |               |      |      |      |      |      |      |        |
| 156  | 87.15 | 49.98 | 0.07±0.02 | hanging       | 2992 | 3262 | 3158 | 56.2 | 37.7 | 0.09 | N, 11  |
| 157  | 87.17 | 49.94 | 0.03±0.01 | hanging       | 3096 | 3239 | 3201 | 42.2 | 23.9 | 0.03 | N, 349 |
| 158  | 87.11 | 49.91 | 0.01±0.01 | hanging       | 3118 | 3248 | 3181 | 45.4 | 38.7 | 0.02 | N, 354 |
| 159  | 87.11 | 49.91 | 0.01±0.01 | hanging       | 3131 | 3338 | 3260 | 53.8 | 36.5 | 0.02 | N, 354 |
| 160  | 87.10 | 49.91 | 0.10±0.02 | hanging       | 2913 | 3322 | 3089 | 54.7 | 37.0 | 0.12 | N, 11  |

|      |       |       |           |               |      |      |      |      |      |      |         |
|------|-------|-------|-----------|---------------|------|------|------|------|------|------|---------|
| 161  | 87.10 | 49.92 | 0.03±0.01 | cirque        | 3107 | 3216 | 3166 | 35.9 | 23.7 | 0.03 | N, 354  |
| 162  | 87.07 | 49.92 | 0.96±0.10 | cirque        | 2754 | 3431 | 3130 | 62.4 | 32.8 | 1.25 | N, 17   |
| 163  | 87.06 | 49.93 | 0.03±0.01 | hanging       | 2988 | 3172 | 3111 | 64.2 | 25.7 | 0.04 | N, 6    |
| 164  | 87.05 | 49.93 | 0.21±0.05 | cirque        | 2708 | 3224 | 2895 | 62.7 | 28.7 | 0.26 | N, 17   |
|      |       |       |           | cirque-       |      |      |      |      |      |      |         |
| 165  | 87.05 | 49.93 | 0.06±0.02 | hanging       | 3134 | 3366 | 3237 | 55.8 | 35.9 | 0.08 | SE, 118 |
| 166, |       |       |           |               |      |      |      |      |      |      |         |
| 167, |       |       |           |               |      |      |      |      |      |      |         |
| 168  | 87.05 | 49.94 | 0.54±0.08 | cirque        | 2715 | 3409 | 2955 | 62.7 | 28.0 | 0.66 | NE, 23  |
| 169  | 87.03 | 49.94 | 0.57±0.06 | cirque-valley | 2911 | 3338 | 3121 | 53.1 | 22.7 | 0.63 | N, 0    |
| 170  | 87.02 | 49.94 | 0.19±0.03 | cirque        | 2812 | 3256 | 3039 | 66.5 | 30.2 | 0.24 | N, 0    |
| 171  | 87.01 | 49.95 | 0.02±0.01 | hanging       | 3159 | 3306 | 3243 | 54.4 | 38.3 | 0.03 | N, 11   |
|      |       |       |           | cirque-       |      |      |      |      |      |      |         |
| 172  | 87.01 | 49.95 | 0.03±0.01 | hanging       | 3072 | 3250 | 3198 | 56.4 | 34.9 | 0.04 | N, 11   |

In total, in the basin of the Yungur river 51 glaciers are reconstructed with the total area of 10.75±1.76 km<sup>2</sup>, minimal altitude 2581 m , maximal altitude 3525 m, area weighted average ELA 3050 m,

#### Karagem river basin

|      |       |       |           |               |      |      |      |      |      |      |         |
|------|-------|-------|-----------|---------------|------|------|------|------|------|------|---------|
| L172 | 87.11 | 49.91 | 0.05±0.01 | cirque-valley | 3031 | 3148 | 3074 | 38,4 | 19.4 | 0.05 | E, 84   |
| 173  | 87.21 | 49.93 | 0.12±0.02 | cirque        | 2886 | 3344 | 3095 | 74,4 | 43.7 | 0.20 | NE, 17  |
| M4   | 87.21 | 49.94 | 0.08±0.02 | cirque        | 2899 | 3116 | 2988 | 50,6 | 27.0 | 0.09 | E, 90   |
| 174  | 87.25 | 49.94 | 0.03±0.02 | hanging       | 3138 | 3295 | 3188 | 46,7 | 24.9 | 0.03 | SE, 163 |
| 175  | 87.24 | 49.94 | 0.04±0.02 | hanging       | 3127 | 3295 | 3193 | 48,8 | 24.6 | 0.05 | NE, 23  |
| 176  | 87.23 | 49.95 | 0.74±0.10 | cirque-valley | 2795 | 3410 | 3051 | 76,5 | 26.0 | 0.88 | E, 91   |
| 177  | 87.28 | 49.96 | 0.13±0.03 | cirque        | 2918 | 3184 | 3020 | 66,5 | 27.3 | 0.15 | E, 39   |
| 178  | 87.30 | 49.96 | 0.17±0.03 | cirque        | 2987 | 3158 | 3072 | 43,1 | 16.9 | 0.18 | E, 141  |
| 179  | 87.32 | 49.94 | 0.17±0.04 | cirque        | 2869 | 3416 | 3065 | 69,0 | 33.3 | 0.23 | NE, 45  |
| 180  | 87.33 | 49.96 | 0.33±0.04 | cirque-valley | 2943 | 3308 | 3131 | 45,7 | 21.2 | 0.36 | NE, 34  |
| 181  | 87.33 | 49.96 | 0.62±0.07 | valley        | 2948 | 3425 | 3205 | 54,5 | 17.6 | 0.66 | SE, 152 |
| 182  | 87.34 | 49.97 | 0.03±0.01 | cirque        | 2786 | 2893 | 2832 | 31,5 | 21.5 | 0.03 | SE, 135 |
| 183  | 87.42 | 50.00 | 0.27±0.04 | cirque-valley | 2891 | 3230 | 3032 | 55,6 | 24.4 | 0.31 | E, 51   |
| 184  | 87.42 | 50.01 | 0.17±0.04 | cirque        | 2873 | 3265 | 2976 | 58,1 | 27.5 | 0.19 | NE, 56  |
| 185  | 87.42 | 50.02 | 0.36±0.06 | cirque        | 2898 | 3297 | 3142 | 45,5 | 24.3 | 0.40 | S, 163  |

|                         |       |       |           |               |      |      |      |      |      |               |
|-------------------------|-------|-------|-----------|---------------|------|------|------|------|------|---------------|
| 186                     | 87.43 | 50.02 | 0.99±0.11 | cirque-valley | 2868 | 3458 | 3104 | 52,5 | 18.7 | 1.07 SE, 129  |
| 187                     | 87.44 | 50.03 | 0.75±0.08 | cirque-valley | 2862 | 3524 | 3111 | 60,6 | 17.7 | 0.80 SE, 152  |
| 188                     | 87.45 | 50.03 | 0.73±0.12 | cirque-valley | 2874 | 3496 | 3235 | 57,1 | 26.5 | 0.83 S, 191   |
| 189,                    |       |       |           |               |      |      |      |      |      |               |
| 190                     | 87.47 | 50.03 | 1.53±0.15 | cirque-valley | 2775 | 3388 | 2982 | 56,3 | 18.7 | 1.67 SE, 129  |
| 191                     | 87.49 | 50.04 | 0.73±0.09 | valley        | 2818 | 3486 | 3118 | 53,8 | 24.9 | 0.84 SE, 96   |
| 192                     | 87.52 | 50.02 | 0.02±0.01 | hanging       | 3161 | 3280 | 3224 | 51,0 | 36.0 | 0.02 N, 28    |
| 193                     | 87.52 | 50.02 | 0.06±0.02 | hanging       | 3040 | 3318 | 3187 | 57.5 | 38.3 | 0.08 NW, 309  |
| 194                     | 87.51 | 49.99 | 0.05±0.01 | hanging       | 3132 | 3362 | 3264 | 54.5 | 38.0 | 0.06 N, 349   |
| 195                     | 87.51 | 50.00 | 0.14±0.03 | cirque        | 2878 | 3173 | 2980 | 51.5 | 25.4 | 0.15 NE, 51   |
| 196                     | 87.52 | 50.01 | 0.25±0.04 | cirque        | 2865 | 3140 | 2980 | 49.0 | 21.4 | 0.27 E, 73    |
| 197                     | 87.57 | 49.99 | 0.05±0.02 | hanging       | 3007 | 3250 | 3178 | 67.3 | 34.0 | 0.07 N, 0     |
| L266                    | 87.54 | 50.01 | 0.12±0.03 | cirque-valley | 2903 | 3181 | 3019 | 48.4 | 25.4 | 0.14 E, 68    |
| 198                     | 87.53 | 50.02 | 0.09±0.02 | cirque        | 2815 | 3070 | 2919 | 47.1 | 32.5 | 0.11 E, 96    |
| 199                     | 87.50 | 50.04 | 1.02±0.09 | valley        | 2779 | 3312 | 3033 | 63.0 | 22.1 | 1.14 SE, 101  |
| 200                     | 87.51 | 50.06 | 1.29±0.14 | valley        | 2763 | 3478 | 3105 | 60.0 | 20.2 | 1.43 SE, 118  |
| 201                     | 87.51 | 50.07 | 0.18±0.04 | slope         | 3356 | 3803 | 3594 | 54.1 | 33.5 | 0.23 E, 101   |
| 202                     | 87.52 | 50.06 | 0.87±0.08 | valley        | 2915 | 3360 | 3095 | 54.1 | 16.1 | 0.93 SE, 118  |
| 203                     | 87.54 | 50.06 | 2.49±0.24 | valley        | 2809 | 3861 | 3238 | 54.7 | 18.1 | 2.88 SW, 186  |
| 204                     | 87.53 | 50.07 | 0.04±0.01 | slope         | 3410 | 3490 | 3461 | 45.4 | 20.0 | 0.05 S, 163   |
| 205                     | 87.55 | 50.05 | 0.85±0.12 | cirque-valley | 2955 | 3394 | 3124 | 52.9 | 19.8 | 0.94 E, 84    |
| 206                     | 87.56 | 50.06 | 0.67±0.22 | cirque        | 3051 | 4113 | 3546 | 56.7 | 33.4 | 1.226 SW, 219 |
| 207                     | 87.58 | 50.05 | 0.74±0.16 | cirque-valley | 3007 | 3959 | 3573 | 55.7 | 27.6 | 0.86 SW, 248  |
| 208                     | 87.58 | 50.03 | 0.06±0.02 | hanging       | 2978 | 3381 | 3279 | 52.7 | 34.3 | 0.07 NW, 315  |
| 209                     | 87.59 | 50.03 | 0.17±0.03 | cirque        | 2996 | 3233 | 3087 | 49.0 | 21.6 | 0.18 E, 101   |
| 210 Bolshoi Abyl-Oyuk   | 87.60 | 50.04 | 4.55±0.31 | valley        | 2538 | 3892 | 3345 | 55.2 | 20.0 | 5.11 SE, 129  |
| 211                     | 87.62 | 50.04 | 0.14±0.02 | cirque        | 2845 | 3137 | 3006 | 51.6 | 29.0 | 0.16 E, 84    |
| 212                     | 87.62 | 50.06 | 0.05±0.03 | valley        | 3579 | 3674 | 3633 | 40.6 | 18.2 | 0.06 SE, 163  |
| 212                     | 87.61 | 50.06 | 2.54±0.22 | valley        | 2482 | 3895 | 3304 | 60.1 | 28.4 | 2.98 SE, 113  |
| 213 Pravyi Karagemskiyi | 87.63 | 50.06 | 0.82±0.09 | valley        | 2739 | 3905 | 3499 | 49.0 | 29.6 | 0.95 SE, 129  |
| 214, Levyi Karagemskiyi |       |       |           |               |      |      |      |      |      |               |
| 215                     | 87.66 | 50.06 | 6.11±0.46 | valley        | 2432 | 3861 | 3310 | 55.6 | 20.8 | 7.21 SW, 207  |



|     |       |       |                              |      |      |      |      |      |              |
|-----|-------|-------|------------------------------|------|------|------|------|------|--------------|
| 216 | 87.69 | 50.05 | 0.02±0.01 slope              | 3579 | 3639 | 3620 | 36.7 | 24.5 | 0.02 SW, 219 |
| 217 | 87.69 | 50.04 | 0.06±0.02 hanging            | 3526 | 3685 | 3615 | 39.6 | 27.3 | 0.07 W, 298  |
| 218 | 87.69 | 50.04 | 0.20±0.04 hanging            | 3130 | 3670 | 3479 | 56.2 | 37.1 | 0.26 W, 287  |
| 219 | 87.68 | 50.04 | 0.16±0.03 hanging            | 2994 | 3613 | 3372 | 56.8 | 37.5 | 0.21 W, 293  |
| 220 | 87.69 | 50.04 | 0.03±0.02 hanging            | 3448 | 3613 | 3542 | 38.7 | 27.0 | 0.03 S, 191  |
| 221 | 87.70 | 50.02 | 0.10±0.04 hanging            | 3161 | 3688 | 3454 | 51.0 | 33.5 | 0.12 NW, 309 |
| 222 | 87.69 | 50.02 | 0.22±0.04 hanging<br>cirque- | 2928 | 3685 | 3450 | 60.7 | 31.6 | 0.27 NW, 298 |
| 223 | 87.68 | 50.02 | 0.09±0.02 hanging            | 3003 | 3183 | 3123 | 44.9 | 19.4 | 0.10 NW, 309 |
| 224 | 87.70 | 50.02 | 0.17±0.03 hanging            | 3307 | 3688 | 3538 | 58.2 | 37.3 | 0.22 S, 180  |

In total, in the basin of the Karagem river 54 glaciers are reconstructed with the total area of 32,45±3,80 km<sup>2</sup>, minimal altitude 2432 m , maximal altitude 4113 m, area weighted average ELA 3111 m.
