# Supplementary material for: Post-Little Ice Age Glacier Recession in the North-Chuya Ridge and Dynamics of the Bolshoi Maashei Glacier, Altai
Source: MDPI journal article supplement (doi:10.3390/rs15082186), 2023-04-20
Supplement: s1 [file s1]

Table S3. Glacier inventory of North-Chuya ridge for 2021. Designations correspond to those in the table S1.

| N                                                                                                                                                                                                                     | name             | $\lambda, ^\circ$ | $\varphi, ^\circ$ | S, km <sup>2</sup> | Morphological type | Z <sub>1</sub> | Z <sub>2</sub> | ELA  | $a_{\max}, ^\circ$ | $a_{\text{av.}}, ^\circ$ | S <sub>3D</sub> , km | E, °    |
|-----------------------------------------------------------------------------------------------------------------------------------------------------------------------------------------------------------------------|------------------|-------------------|-------------------|--------------------|--------------------|----------------|----------------|------|--------------------|--------------------------|----------------------|---------|
| Jelo river basin                                                                                                                                                                                                      |                  |                   |                   |                    |                    |                |                |      |                    |                          |                      |         |
| 1                                                                                                                                                                                                                     |                  | 87.73             | 50.01             | 0.16±0.02          | cirque             | 2920           | 3127           | 2992 | 45.3               | 21.3                     | 0.18                 | E,91    |
| 2                                                                                                                                                                                                                     |                  | 87.72             | 50.01             | 0.58±0.04          | cirque-valley      | 2828           | 3327           | 3033 | 64.9               | 23.3                     | 0.67                 | NE,43   |
| 3                                                                                                                                                                                                                     | Jelo             | 87.71             | 50.04             | 6.34±0.31          | valley             | 2818           | 3688           | 3175 | 58.8               | 16.0                     | 7.36                 | E,102   |
| 4                                                                                                                                                                                                                     |                  | 87.72             | 50.05             | 0.03±0.01          | hanging            | 3279           | 3424           | 3337 | 38.2               | 26.1                     | 0.03                 | SW, 210 |
| 5                                                                                                                                                                                                                     |                  | 87.75             | 50.04             | 0.29±0.03          | slope              | 3303           | 3631           | 3498 | 42.5               | 19.8                     | 0.31                 | SE,137  |
| 6                                                                                                                                                                                                                     |                  | 87.76             | 50.04             | 0.08±0.01          | cirque             | 3087           | 3314           | 3181 | 47.0               | 21.6                     | 0.08                 | E,94    |
| 7                                                                                                                                                                                                                     |                  | 87.77             | 50.05             | 0.02±0.01          | slope              | 3313           | 3334           | 3323 | 20.2               | 9.6                      | 0.02                 | E,87    |
| 8                                                                                                                                                                                                                     | Kupol            | 87.79             | 50.04             | 0.84±0.07          | flat summit        | 3211           | 3552           | 3422 | 28.7               | 13.0                     | 0.86                 | S,173   |
| 9                                                                                                                                                                                                                     |                  | 87.80             | 50.02             | 0.06±0.01          | cirque-hanging     | 2989           | 3246           | 3091 | 44.0               | 29.4                     | 0.07                 | NE,55   |
| 10                                                                                                                                                                                                                    |                  | 87.80             | 50.02             | 0.08±0.02          | cirque-hanging     | 3146           | 3300           | 3249 | 40.3               | 24.2                     | 0.08                 | E,89    |
| In total in the basin of the Jelo river there are 10 glaciers with total area of 8.47± 0.52 km <sup>2</sup> , minimal altitude is 2818 m, maximal altitude is 3688 m, area weighted average ELA is 3179 m             |                  |                   |                   |                    |                    |                |                |      |                    |                          |                      |         |
| Tete river basin                                                                                                                                                                                                      |                  |                   |                   |                    |                    |                |                |      |                    |                          |                      |         |
| 11                                                                                                                                                                                                                    |                  | 87.86             | 50.05             | 0.14±0.03          | flat summit        | 3358           | 3450           | 3404 | 24.2               | 13.2                     | 0.14                 | NE,44   |
| 12                                                                                                                                                                                                                    |                  | 87.88             | 50.05             | 0.09±0.02          | flat summit        | 3253           | 3384           | 3354 | 46.2               | 15.7                     | 0.10                 | N,14    |
| 13                                                                                                                                                                                                                    |                  | 87.89             | 50.05             | 0.22±0.02          | cirque             | 2981           | 3339           | 3121 | 59.8               | 27.2                     | 0.26                 | N,14    |
| 14                                                                                                                                                                                                                    |                  | 87.87             | 50.06             | 0.03±0.01          | cirque-hanging     | 3179           | 3330           | 3280 | 46.5               | 28.0                     | 0.04                 | NE,57   |
| 15                                                                                                                                                                                                                    | Tete             | 87.81             | 50.05             | 0.36±0.04          | valley             | 2880           | 3477           | 3128 | 54.6               | 26.1                     | 0.42                 | NE,56   |
| 16                                                                                                                                                                                                                    |                  | 87.80             | 50.05             | 0.78±0.06          | cirque             | 2912           | 3551           | 3223 | 53.3               | 21.2                     | 0.86                 | NE,39   |
| In total, in the basin of the Tete river 6 glaciers with total area of 1.62±0.13 km <sup>2</sup> have been reconstructed. minimal altitude is 2880 m, maximal altitude is 3551 m. area weighted average ELA is 3208 m |                  |                   |                   |                    |                    |                |                |      |                    |                          |                      |         |
| Aktru river basin                                                                                                                                                                                                     |                  |                   |                   |                    |                    |                |                |      |                    |                          |                      |         |
| 17                                                                                                                                                                                                                    |                  | 87.79             | 50.05             | 0.69±0.04          | slope              | 3095           | 3552           | 3369 | 34.3               | 18.0                     | 0.73                 | NW,333  |
| 18                                                                                                                                                                                                                    | Kar Malogo Aktru | 87.78             | 50.05             | 0.64±0.05          | cirque             | 2816           | 3516           | 3262 | 55.5               | 23.9                     | 0.75                 | N,347   |
| 19                                                                                                                                                                                                                    | Malyi Aktru      | 87.75             | 50.05             | 2.54±0.10          | valley             | 2485           | 3708           | 3301 | 57.3               | 19.3                     | 2.76                 | NE,51   |
| 20                                                                                                                                                                                                                    |                  | 87.75             | 50.06             | 0.04±0.01          | hanging            | 3294           | 3521           | 3423 | 47.7               | 34.4                     | 0.05                 | N,354   |
| 21                                                                                                                                                                                                                    |                  | 87.75             | 50.06             | 0.05±0.01          | hanging            | 3230           | 3517           | 3426 | 59.9               | 34.8                     | 0.06                 | NW,333  |
| 22                                                                                                                                                                                                                    | Pravyi Aktru     | 87.71             | 50.06             | 4.25±0.33          | valley             | 2536           | 3727           | 3227 | 62.1               | 26.1                     | 5.13                 | NE,55   |

|    |               |       |       |           |                |      |      |      |      |      |      |        |
|----|---------------|-------|-------|-----------|----------------|------|------|------|------|------|------|--------|
| 23 |               | 87.74 | 50.05 | 0.01±0.01 | hanging        | 3363 | 3515 | 3480 | 52.6 | 32.2 | 0.02 | N,13   |
| 24 |               | 87.71 | 50.07 | 0.16±0.02 | slope          | 3170 | 3430 | 3268 | 42.2 | 19.0 | 0.17 | SE,116 |
| 25 | Levyi Aktru   | 87.70 | 50.08 | 4.93±0.24 | valley         | 2699 | 3970 | 3305 | 72.3 | 23.0 | 5.89 | E,86   |
| 26 |               | 87.72 | 50.09 | 0.15±0.02 | cirque-hanging | 3255 | 3566 | 3359 | 40.1 | 26.6 | 0.17 | E,68   |
| 27 | Kysyl-Tash    | 87.74 | 50.09 | 0.16±0.03 | cirque         | 2948 | 3442 | 3236 | 61.6 | 35.1 | 0.20 | N,6    |
| 28 |               | 87.71 | 50.09 | 0.17±0.04 | cirque-hanging | 2924 | 3551 | 3223 | 65.3 | 39.2 | 0.23 | N,352  |
| 29 |               | 87.70 | 50.09 | 0.14±0.02 | hanging        | 3225 | 3553 | 3381 | 61.3 | 38.9 | 0.19 | NE,34  |
| 30 | Yan-Karasu    | 87.70 | 50.09 | 1.09±0.14 | valley         | 2805 | 3960 | 3351 | 67.0 | 29.2 | 1.35 | E,74   |
| 31 | Malyi Korumdu | 87.71 | 50.11 | 0.36±0.06 | valley         | 2679 | 3715 | 3101 | 44.5 | 27.9 | 0.43 | NE,27  |
| 32 | Korumdu       | 87.68 | 50.11 | 5.52±0.48 | valley         | 2357 | 3964 | 3280 | 65.4 | 31.3 | 8.10 | NE,39  |
| 33 |               | 87.67 | 50.13 | 0.78±0.10 | cirque-valley  | 2693 | 3967 | 3192 | 54.6 | 34.5 | 1.01 | NE,51  |
| 34 | Kurkurek      | 87.64 | 50.14 | 1.96±0.12 | valley         | 2556 | 3963 | 3257 | 65.6 | 30.4 | 2.54 | N,4    |
| 35 |               | 87.63 | 50.14 | 0.52±0.05 | cirque-valley  | 2800 | 3664 | 3265 | 58.1 | 35.3 | 0.66 | NE,36  |
| 36 |               | 87.62 | 50.15 | 0.86±0.10 | cirque-valley  | 2842 | 3624 | 3215 | 64.1 | 28.1 | 1.11 | N,359  |
| 37 |               | 87.60 | 50.15 | 0.33±0.03 | cirque         | 2876 | 3485 | 3115 | 67.2 | 28.0 | 0.40 | N,14   |

In total, in the basin of the Aktru river 21 glaciers with total area of 25.34±1.99 km<sup>2</sup> are reconstructed, minimal altitude is 2357 m, maximal altitude is 3970 m, area weighted average ELA is 3134 m

#### Maashei river basin

|    |                 |       |       |           |               |      |      |      |      |      |      |        |
|----|-----------------|-------|-------|-----------|---------------|------|------|------|------|------|------|--------|
| 38 |                 | 87.62 | 50.14 | 0.08±0.01 | flat summit   | 3472 | 3564 | 3528 | 23.3 | 13.5 | 0.08 | SW,227 |
| 39 |                 | 87.63 | 50.12 | 1.97±0.12 | valley        | 2791 | 3906 | 3511 | 53.6 | 28.2 | 2.55 | NW,300 |
| 40 |                 | 87.64 | 50.12 | 1.24±0.11 | cirque        | 3087 | 3965 | 3641 | 50.1 | 30.5 | 1.48 | S,174  |
| 41 |                 | 87.66 | 50.11 | 0.18±0.03 | cirque-valley | 3230 | 3792 | 3634 | 50.2 | 29.6 | 0.21 | W,258  |
| 42 | Pravyi Maashei  | 87.65 | 50.10 | 2.88±0.17 | valley        | 2757 | 3952 | 3398 | 69.3 | 28.5 | 3.72 | W,291  |
| 43 |                 | 87.63 | 50.10 | 0.13±0.02 | hanging       | 2991 | 3567 | 3415 | 56.5 | 33.1 | 0.16 | NW,323 |
| 44 |                 | 87.66 | 50.09 | 0.11±0.03 | hanging       | 3259 | 3946 | 3541 | 70.6 | 40.9 | 0.15 | S,182  |
| 45 |                 | 87.67 | 50.09 | 0.33±0.03 | slope         | 3252 | 3963 | 3716 | 75.4 | 39.7 | 0.50 | SW,210 |
| 46 |                 | 87.66 | 50.07 | 4.84±0.22 | valley        | 2710 | 3867 | 3196 | 70.9 | 24.0 | 5.87 | NW,324 |
| 47 | Bolshoi Maashei | 87.61 | 50.06 | 6.22±0.23 | valley        | 2225 | 4107 | 2890 | 69.8 | 19.8 | 7.07 | N,18   |
| 48 |                 | 87.59 | 50.07 | 2.12±     | valley        | 2609 | 4085 | 3263 | 66.9 | 33.5 | 2.89 | NE,32  |
| 49 |                 | 87.58 | 50.08 | 0.28±0.03 | hanging       | 2757 | 3676 | 3225 | 56.1 | 37.3 | 0.37 | N,356  |
| 50 |                 | 87.57 | 50.08 | 0.28±0.04 | hanging       | 2663 | 3676 | 3172 | 55.2 | 36.5 | 0.36 | N,348  |
| 51 | Levyi Maashei   | 87.55 | 50.07 | 3.46±0.17 | valley        | 2757 | 4110 | 3263 | 64.8 | 30.2 | 4.51 | N,1    |

|    |       |       |           |               |      |      |      |      |      |      |        |
|----|-------|-------|-----------|---------------|------|------|------|------|------|------|--------|
| 52 | 87.53 | 50.08 | 0.20±0.03 | cirque        | 2950 | 3382 | 3108 | 58.3 | 31.2 | 0.25 | NE,60  |
| 53 | 87.53 | 50.09 | 0.67±0.06 | cirque        | 2903 | 3447 | 3099 | 57.0 | 21.1 | 0.76 | E,85   |
| 54 | 87.53 | 50.10 | 0.02±0.01 | hanging       | 3258 | 3374 | 3344 | 48.8 | 30.6 | 0.03 | S,175  |
| 55 | 87.55 | 50.10 | 0.13±0.02 | hanging       | 3113 | 3345 | 3215 | 42.3 | 23.9 | 0.15 | W,249  |
| 56 | 87.55 | 50.10 | 0.05±0.01 | hanging       | 3108 | 3312 | 3216 | 54.5 | 27.7 | 0.06 | E,71   |
| 57 | 87.55 | 50.10 | 0.18±0.02 | hanging       | 3123 | 3345 | 3232 | 46.3 | 23.5 | 0.21 | NW,318 |
| 58 | 87.54 | 50.10 | 0.03±0.01 | hanging       | 3063 | 3223 | 3164 | 33.2 | 22.3 | 0.04 | N,6    |
| 59 | 87.53 | 50.10 | 0.11±0.02 | hanging       | 3167 | 3374 | 3312 | 48.4 | 28.8 | 0.13 | NE,38  |
| 60 | 87.53 | 50.12 | 0.03±0.01 | hanging       | 3080 | 3242 | 3171 | 48.1 | 31.0 | 0.03 | N,354  |
| 61 | 87.52 | 50.11 | 0.21±0.03 | hanging       | 3065 | 3514 | 3347 | 52.0 | 34.2 | 0.26 | N,20   |
| 62 | 87.51 | 50.12 | 0.50±0.05 | cirque-valley | 2828 | 3515 | 3105 | 56.8 | 30.8 | 0.61 | N,22   |
| 63 | 87.50 | 50.12 | 0.49±0.07 | cirque        | 2930 | 3519 | 3130 | 62.2 | 24.9 | 0.59 | E,72   |
| 64 | 87.53 | 50.14 | 0.04±0.01 | cirque        | 2882 | 3193 | 3021 | 55.1 | 41.0 | 0.06 | E,94   |
| 65 | 87.53 | 50.15 | 0.42±0.06 | cirque        | 2668 | 3527 | 3118 | 59.1 | 34.0 | 0.57 | N,347  |
| 66 | 87.52 | 50.15 | 0.10±0.02 | hanging       | 3054 | 3529 | 3342 | 55.1 | 40.3 | 0.14 | N,2    |
| 67 | 87.52 | 50.15 | 0.06±0.01 | hanging       | 2943 | 3378 | 3216 | 65.0 | 40.7 | 0.08 | N,18   |
| 68 | 87.51 | 50.16 | 0.18±0.04 | cirque        | 2803 | 3295 | 3018 | 51.6 | 29.8 | 0.22 | NE,36  |
| 69 | 87.51 | 50.14 | 0.69±0.04 | valley        | 2819 | 3561 | 3116 | 62.3 | 28.0 | 0.84 | N,340  |
| 70 | 87.51 | 50.13 | 0.14±0.02 | hanging       | 3167 | 3591 | 3437 | 50.2 | 35.1 | 0.17 | NW,299 |
| 71 | 87.49 | 50.14 | 1.65±0.10 | valley        | 2666 | 3667 | 3056 | 60.9 | 24.1 | 1.93 | N,11   |
| 72 | 87.48 | 50.14 | 0.73±0.10 | cirque        | 2732 | 3416 | 3069 | 56.4 | 32.1 | 1.06 | N,11   |
| 73 | 87.47 | 50.15 | 0.02±0.01 | hanging       | 2877 | 3123 | 3035 | 50.2 | 33.2 | 0.03 | N,0    |

In total, in the basin of the Maashei 36 glaciers with total area of 30.79±2.06 km<sup>2</sup> are reconstructed, minimal altitude is 2225 m, maximal altitude 4110 m, area weighted average ELA is 3081 m.

#### Shavly river basin

|    |       |       |           |               |      |      |      |      |      |      |       |
|----|-------|-------|-----------|---------------|------|------|------|------|------|------|-------|
| 74 | 87.46 | 50.17 | 0.21±0.02 | cirque        | 2964 | 3141 | 3033 | 42.2 | 16.0 | 0.22 | N,342 |
| 75 | 87.45 | 50.17 | 0.17±0.03 | cirque        | 2700 | 3247 | 2961 | 66.5 | 33.4 | 0.22 | N,349 |
| 76 | 87.46 | 50.15 | 0.98±0.07 | cirque-valley | 2760 | 3404 | 3035 | 51.9 | 22.6 | 1.11 | N,355 |
| 77 | 87.45 | 50.14 | 0.16±0.02 | hanging       | 2805 | 3374 | 3206 | 51.7 | 34.0 | 0.20 | N,339 |
| 78 | 87.44 | 50.14 | 0.11±0.02 | hanging       | 3028 | 3383 | 3233 | 58.7 | 35.4 | 0.14 | N,357 |
| 79 | 87.44 | 50.14 | 0.09±0.02 | hanging       | 2995 | 3370 | 3214 | 56.7 | 35.8 | 0.12 | N,349 |
| 80 | 87.43 | 50.14 | 0.03±0.01 | hanging       | 3050 | 3224 | 3154 | 45.6 | 28.9 | 0.04 | N,343 |

|     |       |       |                         |      |      |      |      |      |             |
|-----|-------|-------|-------------------------|------|------|------|------|------|-------------|
| 81  | 87.43 | 50.14 | 0.05±0.01 hanging       | 3086 | 3183 | 3143 | 37.6 | 23.2 | 0.05 N,352  |
| 82  | 87.43 | 50.14 | 0.03±0.01 hanging       | 3032 | 3182 | 3128 | 38.6 | 24.5 | 0.04 N,16   |
| 83  | 87.48 | 50.13 | 0.07±0.02 hanging       | 3235 | 3667 | 3517 | 51.9 | 35.9 | 0.09 NW,315 |
| 84  | 87.48 | 50.13 | 0.06±0.01 hanging       | 3106 | 3573 | 3409 | 55.3 | 38.6 | 0.08 W,284  |
| 85  | 87.48 | 50.12 | 0.01±0.01 hanging       | 3440 | 3560 | 3495 | 43.5 | 37.7 | 0.01 SW,214 |
| 86  | 87.50 | 50.10 | 1.78±0.14 Cirque-valley | 2696 | 3713 | 3168 | 71.6 | 30.4 | 2.59 N,8    |
| 87  | 87.49 | 50.10 | 0.20±0.02 hanging       | 3047 | 3716 | 3451 | 70.4 | 42.9 | 0.29 NE,26  |
| 88  | 87.48 | 50.10 | 0.20±0.02 hanging       | 3175 | 3664 | 3511 | 57.2 | 32.4 | 0.24 NE,25  |
| 89  | 87.47 | 50.10 | 0.11±0.02 hanging       | 3298 | 3721 | 3495 | 55.7 | 34.3 | 0.14 NE,34  |
| 90  | 87.46 | 50.10 | 0.17±0.03 hanging       | 3044 | 3714 | 3486 | 67.4 | 42.1 | 0.26 NW,334 |
| 91  | 87.47 | 50.10 | 0.10±0.02 hanging       | 3539 | 3721 | 3630 | 54.3 | 27.8 | 0.12 S,171  |
| 92  | 87.52 | 50.09 | 0.03±0.01 slope         | 3362 | 3447 | 3404 | 41.8 | 23.7 | 0.03 SW,242 |
| 93  | 87.52 | 50.08 | 0.07±0.02 hanging       | 3160 | 3334 | 3256 | 49.3 | 19.9 | 0.08 W,287  |
| 94  | 87.52 | 50.08 | 0.04±0.01 hanging       | 3214 | 3334 | 3262 | 36.0 | 21.3 | 0.05 S,163  |
| 95  | 87.53 | 50.08 | 0.26±0.03 cirque        | 3005 | 3490 | 3293 | 51.5 | 27.3 | 0.30 W,273  |
| 96  | 87.52 | 50.07 | 0.73±0.06 cirque-valley | 2741 | 3528 | 3074 | 67.5 | 30.8 | 0.92 NW,337 |
| 97  | 87.50 | 50.07 | 0.53±0.05 hanging       | 3008 | 3800 | 3511 | 66.2 | 39.3 | 0.73 N,5    |
| 98  | 87.50 | 50.08 | 0.10±0.01 приslope      | 2667 | 2782 | 2718 | 36.2 | 15.2 | 0.10 N,357  |
| 99  | 87.49 | 50.07 | 0.14±0.02 hanging       | 2916 | 3530 | 3301 | 58.0 | 38.8 | 0.19 N,348  |
| 100 | 87.50 | 50.07 | 0.06±0.02 hanging       | 3568 | 3803 | 3695 | 42.1 | 31.7 | 0.07 W,251  |
| 101 | 87.50 | 50.06 | 0.01±0.01 hanging       | 3348 | 3510 | 3458 | 46.3 | 33.5 | 0.02 W,257  |
| 102 | 87.48 | 50.05 | 1.81±0.14 valley        | 2621 | 3489 | 2994 | 59.1 | 22.5 | 2.12 N,2    |
| 103 | 87.46 | 50.05 | 1.25±0.12 cirque        | 2503 | 3691 | 2984 | 68.5 | 31.3 | 1.73 N,9    |
| 104 | 87.44 | 50.05 | 2.44±0.14 valley        | 2591 | 3674 | 3099 | 68.0 | 28.6 | 3.05 N,21   |
| 105 | 87.43 | 50.05 | 0.03±0.01 hanging       | 2997 | 3202 | 3079 | 50.1 | 35.4 | 0.04 NE,61  |
| 106 | 87.42 | 50.06 | 0.59±0.11 cirque        | 2685 | 3411 | 3015 | 64.1 | 31.1 | 0.82 NE,54  |
| 107 | 87.41 | 50.06 | 0.03±0.01 hanging       | 3173 | 3254 | 3215 | 33.4 | 18.8 | 0.03 S,168  |
| 108 | 87.42 | 50.08 | 0.06±0.01 cirque        | 2898 | 3141 | 3026 | 51.8 | 27.7 | 0.07 NW,335 |
| 109 | 87.42 | 50.07 | 0.67±0.06 valley        | 2805 | 3251 | 2991 | 60.7 | 16.9 | 0.75 N,7    |
| 110 | 87.41 | 50.06 | 0.05±0.01 hanging       | 3020 | 3251 | 3173 | 49.3 | 30.7 | 0.06 NW,293 |
| 111 | 87.39 | 50.06 | 2.13±0.14 valley        | 2440 | 3642 | 3048 | 64.1 | 27.1 | 2.52 NE,29  |
| 112 | 87.38 | 50.07 | 0.12±0.02 flat summit   | 3034 | 3435 | 3305 | 53.1 | 32.6 | 0.15 NE,67  |

|     |       |       |           |               |      |      |      |      |      |      |       |
|-----|-------|-------|-----------|---------------|------|------|------|------|------|------|-------|
| 113 | 87.38 | 50.08 | 0.05±0.01 | hanging       | 3051 | 3350 | 3268 | 56.3 | 30.2 | 0.06 | NE,63 |
| 114 | 87.38 | 50.09 | 0.04±0.01 | hanging       | 3005 | 3290 | 3191 | 62.5 | 33.5 | 0.04 | N,18  |
| 115 | 87.37 | 50.07 | 0.34±0.04 | cirque-valley | 2818 | 3322 | 3019 | 48.4 | 26.9 | 0.39 | N,338 |
| 116 | 87.38 | 50.07 | 1.04±0.09 | valley        | 2712 | 3609 | 3057 | 52.2 | 22.8 | 1.16 | N,342 |
| 117 | 87.35 | 50.07 | 0.14±0.02 | cirque        | 3016 | 3433 | 3265 | 66.3 | 39.6 | 0.19 | NE,37 |

In total, in the basin of the Shavly river there are 44 glaciers with the total area of 17.31±1.65 km<sup>2</sup>, minimal altitude 2440 m, maximal altitude 3803 m, area weighted average ELA is 3059 m

#### Yungur river basin

|     |       |       |           |                |      |      |      |      |      |      |        |
|-----|-------|-------|-----------|----------------|------|------|------|------|------|------|--------|
| 118 | 87.37 | 50.06 | 0.77±0.08 | cirque-valley  | 2760 | 3472 | 3061 | 69.4 | 30.2 | 1.01 | NW,333 |
| 119 | 87.36 | 50.06 | 0.12±0.02 | hanging        | 2858 | 3427 | 3250 | 62.0 | 38.0 | 0.16 | N,19   |
| 120 | 87.35 | 50.05 | 0.04±0.01 | hanging        | 3112 | 3433 | 3337 | 58.2 | 32.0 | 0.05 | NW,310 |
| 121 | 87.35 | 50.06 | 0.04±0.01 | hanging        | 2943 | 3347 | 3244 | 55.0 | 32.8 | 0.04 | N,353  |
| 122 | 87.38 | 50.05 | 0.14±0.02 | cirque         | 2976 | 3130 | 3045 | 39.0 | 21.0 | 0.15 | SE,142 |
| 123 | 87.39 | 50.05 | 0.30±0.03 | cirque         | 2965 | 3366 | 3074 | 47.9 | 21.7 | 0.33 | SW,204 |
| 124 | 87.41 | 50.05 | 0.74±0.05 | cirque-valley  | 2892 | 3371 | 3118 | 54.9 | 20.5 | 0.82 | W,286  |
| 125 | 87.43 | 50.03 | 0.82±0.05 | cirque-valley  | 2905 | 3322 | 3078 | 60.2 | 18.3 | 0.89 | NW,298 |
| 126 | 87.42 | 50.03 | 0.07±0.02 | hanging        | 3131 | 3350 | 3228 | 59.2 | 39.2 | 0.09 | NW,309 |
| 127 | 87.40 | 49.99 | 0.25±0.04 | cirque         | 2753 | 3220 | 2963 | 58.9 | 27.1 | 0.29 | N,11   |
| 128 | 87.39 | 49.98 | 0.01±0.01 | hanging        | 3041 | 3129 | 3098 | 35.4 | 21.0 | 0.01 | N,1    |
| 129 | 87.38 | 49.97 | 0.05±0.01 | hanging        | 3012 | 3223 | 3151 | 56.7 | 23.3 | 0.05 | NE,23  |
| 130 | 87.37 | 49.97 | 0.16±0.03 | hanging        | 2671 | 3356 | 3101 | 63.2 | 35.0 | 0.21 | N,352  |
| 131 | 87.34 | 49.97 | 0.02±0.01 | hanging        | 2981 | 3233 | 3157 | 64.3 | 38.1 | 0.03 | N,353  |
| 132 | 87.33 | 49.97 | 0.05±0.01 | hanging        | 2966 | 3270 | 3189 | 54.3 | 29.0 | 0.06 | N,3    |
| 133 | 87.33 | 49.97 | 0.03±0.01 | hanging        | 3047 | 3369 | 3221 | 54.4 | 43.4 | 0.04 | N,9    |
| 134 | 87.32 | 49.97 | 0.09±0.02 | cirque         | 2848 | 3157 | 2982 | 65.9 | 50.1 | 0.15 | N,2    |
| 135 | 87.31 | 49.97 | 0.17±0.04 | cirque-hanging | 2785 | 3253 | 3014 | 59.9 | 33.0 | 0.23 | N,360  |
| 136 | 87.29 | 49.97 | 0.36±0.04 | cirque-valley  | 2838 | 3248 | 3069 | 56.0 | 23.3 | 0.40 | N,342  |
| 137 | 87.28 | 49.96 | 0.01±0.01 | hanging        | 3088 | 3157 | 3120 | 34.6 | 26.2 | 0.01 | N,347  |
| 138 | 87.27 | 49.96 | 0.01±0.01 | hanging        | 3087 | 3209 | 3151 | 45.8 | 36.3 | 0.02 | NE,31  |
| 139 | 87.26 | 49.96 | 0.01±0.01 | hanging        | 3068 | 3199 | 3167 | 57.6 | 34.3 | 0.02 | SE,117 |
| 140 | 87.25 | 49.96 | 0.05±0.01 | hanging        | 3030 | 3404 | 3260 | 62.1 | 40.7 | 0.07 | N,358  |
| 141 | 87.24 | 49.96 | 0.11±0.02 | cirque         | 2689 | 3293 | 3024 | 52.2 | 37.2 | 0.15 | N,340  |

|     |       |       |            |                |      |      |      |      |      |      |        |
|-----|-------|-------|------------|----------------|------|------|------|------|------|------|--------|
| 142 | 87.23 | 49.96 | 0.16±0.04  | cirque         | 2793 | 3378 | 3044 | 60.5 | 35.0 | 0.20 | N,0    |
| 143 | 87.22 | 49.96 | 0.66±0.07  | valley         | 2696 | 3346 | 2954 | 66.7 | 25.6 | 0.77 | N,359  |
| 144 | 87.21 | 49.96 | 0.33±0.04  | valley         | 2641 | 3279 | 2894 | 76.7 | 29.0 | 0.40 | N,13   |
| 145 | 87.20 | 49.96 | 0.07±0.01  | hanging        | 3054 | 3278 | 3192 | 60.5 | 34.7 | 0.09 | NE,66  |
| 146 | 87.20 | 49.97 | 0.08±0.01  | cirque-hanging | 2854 | 3237 | 3080 | 47.5 | 36.7 | 0.10 | N,11   |
| 147 | 87.18 | 49.96 | 0.04±0.01  | hanging        | 2823 | 3013 | 2928 | 45.9 | 28.1 | 0.04 | NE,44  |
| 148 | 87.18 | 49.95 | 0.07±0.01  | cirque         | 2977 | 3308 | 3159 | 65.1 | 45.0 | 0.10 | N,20   |
| 149 | 87.17 | 49.96 | 0.05±0.01  | hanging        | 2980 | 3516 | 3177 | 75.8 | 59.4 | 0.10 | SE,117 |
| 150 | 87.17 | 49.96 | 0.05±0.01  | hanging        | 3210 | 3525 | 3405 | 68.0 | 40.2 | 0.06 | NE,36  |
| 151 | 87.17 | 49.96 | 0.06±0.01  | hanging        | 3035 | 3495 | 3340 | 61.8 | 38.2 | 0.09 | N,15   |
| 152 | 87.17 | 49.97 | 0.02±0.01  | hanging        | 2945 | 3331 | 3092 | 70.7 | 53.3 | 0.05 | NE,60  |
| 153 | 87.15 | 49.98 | 0.03±0.08  | hanging        | 3056 | 3153 | 3109 | 35.6 | 21.6 | 0.03 | N,10   |
| 154 | 87.15 | 49.98 | 0.02±0.01  | hanging        | 3102 | 3194 | 3143 | 47.7 | 25.8 | 0.03 | NE,31  |
| 155 | 87.15 | 49.98 | 0.01±0.01  | hanging        | 3116 | 3262 | 3198 | 53.4 | 30.9 | 0.02 | NW,305 |
| 156 | 87.14 | 49.98 | 0.02±0.01  | hanging        | 3103 | 3236 | 3176 | 54.2 | 35.0 | 0.02 | NE,32  |
| 157 | 87.17 | 49.94 | 0.02±0.01  | hanging        | 3092 | 3239 | 3200 | 42.4 | 24.4 | 0.02 | N,353  |
| 158 | 87.11 | 49.91 | 0.01±0.01  | hanging        | 3118 | 3248 | 3181 | 45.4 | 38.7 | 0.02 | N,356  |
| 159 | 87.11 | 49.91 | 0.01±0.01  | hanging        | 3131 | 3338 | 3260 | 53.8 | 36.5 | 0.02 | N,359  |
| 160 | 87.11 | 49.91 | 0.02±0.01  | hanging        | 3086 | 3322 | 3221 | 54.3 | 39.4 | 0.03 | N,359  |
| 161 | 87.10 | 49.92 | 0.02±0.01  | cirque         | 3107 | 3216 | 3165 | 35.9 | 23.8 | 0.02 | N,14   |
| 162 | 87.07 | 49.92 | 0.74±0.07  | cirque         | 2849 | 3431 | 3165 | 64.1 | 32.4 | 0.98 | N,11   |
| 163 | 87.06 | 49.93 | 0.01±0.01  | hanging        | 3066 | 3126 | 3114 | 47.2 | 17.8 | 0.01 | NE,30  |
| 164 | 87.05 | 49.93 | 0.14±0.02  | cirque         | 2763 | 3224 | 2964 | 61.9 | 34.4 | 0.18 | N,9    |
| 165 | 87.05 | 49.93 | 0.04±0.01  | cirque-hanging | 3130 | 3348 | 3227 | 51.2 | 36.1 | 0.05 | SE,123 |
| 166 | 87.05 | 49.94 | 0.13±0.02  | cirque         | 2914 | 3340 | 3131 | 63.4 | 39.9 | 0.19 | N,19   |
| 167 | 87.04 | 49.94 | 0.06±0.01  | cirque         | 3117 | 3409 | 3269 | 60.3 | 41.1 | 0.08 | N,22   |
| 168 | 87.05 | 49.94 | 0.23±0.02  | cirque         | 2731 | 3052 | 2822 | 57.5 | 19.5 | 0.25 | NE,31  |
| 169 | 87.03 | 49.94 | 0.47±0.04  | cirque-valley  | 2942 | 3346 | 3123 | 52.1 | 22.7 | 0.52 | N,355  |
| 170 | 87.02 | 49.94 | 0.15±0.02  | cirque         | 2910 | 3256 | 3047 | 66.6 | 31.2 | 0.18 | N,2    |
| 171 | 87.01 | 49.94 | 0.01±<0.01 | hanging        | 3223 | 3306 | 3279 | 54.6 | 37.3 | 0.01 | NE,35  |
| 172 | 87.01 | 49.95 | 0.01±<0.01 | cirque-hanging | 3175 | 3250 | 3222 | 51.1 | 24.8 | 0.01 | NW,336 |

In total, in the basin of the Yungur river there are 55 glaciers with the total area of  $8.17 \pm 1.07 \text{ km}^2$ , minimal altitude is 2641 m , maximal altitude is 3525 m, area weighted average ELA is 3075 m,

Karagem river basin

|     |       |       |                   |               |      |      |      |      |      |      |        |
|-----|-------|-------|-------------------|---------------|------|------|------|------|------|------|--------|
| 173 | 87.21 | 49.93 | $0.11 \pm 0.02$   | cirque        | 2886 | 3344 | 3095 | 74.7 | 43.9 | 0.19 | N,21   |
| 174 | 87.25 | 49.94 | $0.03 \pm 0.01$   | hanging       | 3138 | 3295 | 3188 | 46.7 | 25.1 | 0.03 | SE,152 |
| 175 | 87.24 | 49.94 | $0.03 \pm 0.01$   | hanging       | 3148 | 3295 | 3201 | 48.9 | 24.2 | 0.03 | NE,34  |
| 176 | 87.23 | 49.95 | $0.66 \pm 0.07$   | cirque-valley | 2855 | 3410 | 3063 | 75.5 | 25.0 | 0.78 | E,93   |
| 177 | 87.27 | 49.96 | $0.09 \pm 0.02$   | cirque        | 2943 | 3022 | 3033 | 68.4 | 26.4 | 0.11 | NE,48  |
| 178 | 87.30 | 49.96 | $0.12 \pm 0.02$   | cirque        | 3013 | 3145 | 3077 | 42.5 | 14.2 | 0.13 | E,94   |
| 179 | 87.32 | 49.94 | $0.15 \pm 0.03$   | cirque        | 2869 | 3416 | 3058 | 69.2 | 32.7 | 0.21 | NE,57  |
| 180 | 87.33 | 49.96 | $0.27 \pm 0.03$   | cirque-valley | 2988 | 3308 | 3147 | 42.8 | 21.1 | 0.29 | NE,47  |
| 181 | 87.33 | 49.97 | $0.54 \pm 0.04$   | valley        | 3024 | 3419 | 3224 | 49.8 | 17.1 | 0.57 | SE,115 |
| 182 | 87.34 | 49.97 | $0.03 \pm 0.01$   | cirque        | 2786 | 2893 | 2832 | 31.5 | 21.5 | 0.03 | SE,135 |
| 183 | 87.42 | 50.00 | $0.20 \pm 0.03$   | cirque-valley | 2903 | 3224 | 3040 | 44.3 | 24.0 | 0.22 | E,73   |
| 184 | 87.42 | 50.01 | $0.13 \pm 0.03$   | cirque        | 2886 | 3265 | 2994 | 58.3 | 30.2 | 0.16 | NE,57  |
| 185 | 87.42 | 50.02 | $0.32 \pm 0.04$   | cirque        | 2898 | 3297 | 3149 | 45.3 | 23.4 | 0.36 | S,159  |
| 186 | 87.43 | 50.02 | $0.97 \pm 0.07$   | cirque-valley | 2868 | 3458 | 3105 | 52.5 | 18.6 | 1.05 | SE,114 |
| 187 | 87.44 | 50.03 | $0.66 \pm 0.05$   | cirque-valley | 2949 | 3523 | 3131 | 60.9 | 17.6 | 0.71 | SE,149 |
| 188 | 87.45 | 50.03 | $0.62 \pm 0.08$   | cirque-valley | 2895 | 3495 | 3247 | 57.2 | 26.6 | 0.71 | S,194  |
| 189 | 87.47 | 50.03 | $0.14 \pm 0.02$   | cirque        | 2853 | 3089 | 2946 | 57.9 | 26.0 | 0.16 | E,69   |
| 190 | 87.47 | 50.03 | $1.11 \pm 0.07$   | cirque-valley | 2822 | 3415 | 3008 | 51.9 | 18.0 | 1.21 | SE,135 |
| 191 | 87.49 | 50.04 | $0.62 \pm 0.06$   | valley        | 2887 | 3486 | 3139 | 53.5 | 25.2 | 0.72 | E,108  |
| 192 | 87.52 | 50.02 | $0.01 \pm < 0.01$ | hanging       | 3196 | 3280 | 3233 | 50.9 | 36.6 | 0.01 | NE,30  |
| 193 | 87.52 | 50.02 | $0.04 \pm 0.01$   | hanging       | 3124 | 3318 | 3232 | 57.2 | 34.3 | 0.04 | NW,296 |
| 194 | 87.51 | 49.99 | $0.02 \pm 0.01$   | hanging       | 3197 | 3362 | 3311 | 53.2 | 39.8 | 0.02 | N,356  |
| 195 | 87.51 | 50.00 | $0.06 \pm 0.01$   | cirque        | 2885 | 3065 | 2965 | 42.6 | 23.9 | 0.06 | NE,58  |
| 196 | 87.52 | 50.01 | $0.17 \pm 0.02$   | cirque        | 2879 | 3140 | 2998 | 49.4 | 23.2 | 0.19 | E,68   |
| 197 | 87.57 | 49.99 | $0.03 \pm 0.01$   | hanging       | 3079 | 3254 | 3206 | 67.1 | 29.2 | 0.04 | N,359  |
| 198 | 87.52 | 50.02 | $0.05 \pm 0.01$   | cirque        | 2868 | 3054 | 2957 | 47.0 | 37.9 | 0.06 | E,84   |
| 199 | 87.50 | 50.04 | $0.85 \pm 0.05$   | valley        | 2858 | 3312 | 3050 | 55.4 | 20.6 | 0.94 | SE,126 |
| 200 | 87.51 | 50.06 | $1.14 \pm 0.08$   | valley        | 2860 | 3513 | 3123 | 60.5 | 19.6 | 1.28 | E,109  |
| 201 | 87.51 | 50.07 | $0.18 \pm 0.03$   | slope         | 3356 | 3803 | 3594 | 53.8 | 33.4 | 0.23 | E,110  |

|     |                    |       |       |           |                |      |      |      |      |      |      |        |
|-----|--------------------|-------|-------|-----------|----------------|------|------|------|------|------|------|--------|
| 202 |                    | 87.52 | 50.06 | 0.67±0.04 | valley         | 2976 | 3335 | 3108 | 57.0 | 14.7 | 0.71 | SE,123 |
| 203 |                    | 87.54 | 50.06 | 2.18±0.14 | valley         | 2884 | 3861 | 3262 | 54.4 | 17.2 | 2.45 | S,198  |
| 204 |                    | 87.53 | 50.07 | 0.04±0.01 | slope          | 3410 | 3490 | 3461 | 45.4 | 20.0 | 0.05 | S,159  |
| 205 |                    | 87.55 | 50.05 | 0.53±0.07 | cirque-valley  | 2971 | 3394 | 3127 | 52.6 | 20.3 | 0.60 | E,83   |
| 206 |                    | 87.56 | 50.06 | 0.47±0.10 | cirque         | 3088 | 4113 | 3689 | 56.6 | 35.9 | 0.69 | SW,228 |
| 207 |                    | 87.58 | 50.05 | 0.68±0.09 | cirque-valley  | 3028 | 3959 | 3595 | 56.5 | 26.9 | 0.79 | SW,226 |
| 208 |                    | 87.58 | 50.03 | 0.05±0.01 | hanging        | 2990 | 3381 | 3275 | 52.9 | 34.2 | 0.07 | NW,299 |
| 209 |                    | 87.59 | 50.03 | 0.09±0.01 | cirque         | 3005 | 3159 | 3078 | 34.4 | 18.7 | 0.10 | E,101  |
| 210 | Bolshoi Abyl-Oyuk  | 87.60 | 50.04 | 4.22±0.19 | valley         | 2679 | 3892 | 3379 | 55.2 | 19.7 | 4.72 | SE,141 |
| 211 |                    | 87.62 | 50.04 | 0.12±0.02 | cirque         | 2845 | 3137 | 3009 | 52.1 | 28.5 | 0.14 | E,82   |
| 212 |                    | 87.62 | 50.06 | 2.37±0.17 | valley         | 2525 | 3895 | 3342 | 58.9 | 28.7 | 2.72 | SE,138 |
| 213 | Pravyi Karagemskiy | 87.63 | 50.06 | 0.82±0.06 | valley         | 2739 | 3905 | 3499 | 49.0 | 29.6 | 0.95 | SE,139 |
| 214 |                    | 87.66 | 50.06 | 3.11±0.15 | valley         | 2904 | 3861 | 3326 | 53.8 | 19.1 | 3.49 | S,163  |
| 215 | Levyi Karagemskiy  | 87.68 | 50.06 | 2.64±0.16 | valley         | 2733 | 3698 | 3351 | 55.3 | 21.5 | 3.01 | W,263  |
| 216 |                    | 87.69 | 50.05 | 0.02±0.01 | slope          | 3579 | 3639 | 3620 | 36.7 | 24.5 | 0.02 | SW,216 |
| 217 |                    | 87.69 | 50.04 | 0.05±0.01 | hanging        | 3526 | 3685 | 3617 | 36.4 | 26.7 | 0.05 | NW,294 |
| 218 |                    | 87.69 | 50.04 | 0.18±0.02 | hanging        | 3130 | 3670 | 3488 | 56.3 | 36.3 | 0.22 | W,284  |
| 219 |                    | 87.68 | 50.04 | 0.15±0.02 | hanging        | 2994 | 3613 | 3387 | 55.0 | 36.8 | 0.19 | W,292  |
| 220 |                    | 87.69 | 50.04 | 0.03±0.01 | hanging        | 3448 | 3613 | 3542 | 39.8 | 27.5 | 0.04 | S,190  |
| 221 |                    | 87.70 | 50.02 | 0.09±0.02 | hanging        | 3189 | 3688 | 3462 | 51.0 | 33.4 | 0.12 | NW,303 |
| 222 |                    | 87.69 | 50.02 | 0.22±0.03 | hanging        | 2928 | 3685 | 3460 | 60.2 | 30.9 | 0.26 | NW,295 |
| 223 |                    | 87.68 | 50.02 | 0.06±0.01 | cirque-hanging | 3047 | 3173 | 3134 | 33.8 | 16.1 | 0.06 | NW,318 |
| 224 |                    | 87.70 | 50.02 | 0.17±0.02 | hanging        | 3307 | 3688 | 3541 | 58.1 | 37.0 | 0.22 | S,182  |

In total, in the basin of the Karagem river there are 52 glaciers with the total area of 28,31±2,29 km<sup>2</sup>, minimal altitude is 2525 m , maximal altitude is 4113 m, area weighted average ELA is 3160 m.
