# Supplementary material for: Post-Little Ice Age Glacier Recession in the North-Chuya Ridge and Dynamics of the Bolshoi Maashei Glacier, Altai
Source: MDPI journal article supplement (doi:10.3390/rs15082186), 2023-04-20
Supplement: s1 [file s1]

Table S1. LIA glacier inventory of the North-Chuya ridge. Designations in the table:  $N$  - glacier number according to this inventory,  $\lambda$ , ° - longitude of the central point,  $\varphi$ , ° - latitude of the central point,  $S$ , km<sup>2</sup> - glacier area,  $Z_1$  - height of the lower point of the glacier, m,  $Z_2$  - height of the upper point glacier, m,  $a_{\max}$ , ° - maximal slope angle of the glacier,  $a_{\text{av}}$ , ° - average slope of the glacier,  $S_{3D}$ , km - 3D surface area of the glacier,  $E$  - average exposure of the glacier,  $E$ , ° - average exposure of the glacier in degrees. The numerical numbers of glaciers correspond to the numbering of modern glaciers, the L-index denotes glaciers that existed during the Little Ice Age, but disappeared by 2021.

| $N$                                                                                                                                                                                              | name  | $\lambda$ , ° | $\varphi$ , ° | $S$ , km <sup>2</sup> | Morphological type | $Z_1$ | $Z_2$ | $ELA$ | $a_{\max}$ , ° | $a_{\text{av}}$ , ° | $S_{3D}$ , km | $E$ , ° |
|--------------------------------------------------------------------------------------------------------------------------------------------------------------------------------------------------|-------|---------------|---------------|-----------------------|--------------------|-------|-------|-------|----------------|---------------------|---------------|---------|
| Jelo river basin                                                                                                                                                                                 |       |               |               |                       |                    |       |       |       |                |                     |               |         |
| 1                                                                                                                                                                                                |       | 87.73         | 50.01         | 1.02±0.05             | cirque             | 2768  | 3194  | 2939  | 53.5           | 21.6                | 1.14          | E, 104  |
| 2-3-4                                                                                                                                                                                            | Jelo  | 87.72         | 50.03         | 10.02±0.30            | valley             | 2512  | 3685  | 2904  | 66.0           | 18.5                | 11.06         | E, 108  |
| 5                                                                                                                                                                                                |       | 87.75         | 50.04         | 0.89±0.05             | slope              | 2924  | 3695  | 3409  | 50.0           | 21.7                | 0.98          | SE, 136 |
| 6                                                                                                                                                                                                |       | 87.76         | 50.04         | 0.67±0.04             | cirque             | 2969  | 3515  | 3172  | 62.3           | 28.0                | 0.79          | SE, 118 |
| 7-8                                                                                                                                                                                              | Kupol | 87.79         | 50.04         | 2.92±0.09             | flat summit        | 3025  | 3552  | 3344  | 37.9           | 16.5                | 3.07          | S, 169  |
| L1                                                                                                                                                                                               |       | 87.80         | 50.01         | 0.25±0.02             | cirque             | 2885  | 3232  | 3011  | 64.5           | 29.7                | 0.30          | N, E49  |
| 9                                                                                                                                                                                                |       | 87.80         | 50.02         | 0.20±0.02             | cirque-hanging     | 3050  | 3317  | 3223  | 58.9           | 26.5                | 0.23          | E, 93   |
| 10                                                                                                                                                                                               |       | 87.80         | 50.02         | 0.30±0.02             | cirque-hanging     | 2989  | 3265  | 3071  | 53.8           | 23.2                | 0.34          | NE, 53  |
| L2                                                                                                                                                                                               |       | 87.80         | 50.03         | 0.25±0.03             | cirque             | 2926  | 3322  | 3089  | 56.6           | 32.0                | 0.31          | E, 77   |
| L3                                                                                                                                                                                               |       | 87.81         | 50.04         | 0.30±0.02             | cirque             | 2980  | 3357  | 3124  | 50.4           | 31.2                | 0.36          | SE, 152 |
| L4                                                                                                                                                                                               |       | 87.83         | 50.05         | 0.26±0.02             | flat summit        | 3150  | 3320  | 3234  | 31.2           | 12.6                | 0.26          | NE, 46  |
| L5                                                                                                                                                                                               |       | 87.87         | 50.05         | 0.65±0.05             | slope              | 3275  | 3450  | 3376  | 43.6           | 16.2                | 0.68          | S, 186  |
| In total, in the basin of the Jelo river 12 glaciers with total area of 17.73±0.73 km <sup>2</sup> , minimal altitude is 2512 m, maximal altitude is 3695 m, area weighted average ELA is 3050 m |       |               |               |                       |                    |       |       |       |                |                     |               |         |
| Tete river basin                                                                                                                                                                                 |       |               |               |                       |                    |       |       |       |                |                     |               |         |
| L6                                                                                                                                                                                               |       | 87.95         | 50.04         | 0.16±0.02             | cirque-hanging     | 2655  | 3057  | 2831  | 69.5           | 35.4                | 0.22          | NE, 39  |
| L7                                                                                                                                                                                               |       | 87.95         | 50.05         | 0.09±0.01             | hanging            | 2782  | 3104  | 2991  | 61.2           | 42.2                | 0.12          | E, 86   |
| L8                                                                                                                                                                                               |       | 87.93         | 50.05         | 0.68±0.05             | flat summit        | 3110  | 3218  | 3166  | 24.2           | 7.9                 | 0.69          | NE, 23  |
| L9                                                                                                                                                                                               |       | 87.94         | 50.05         | 0.11±0.02             | hanging            | 2867  | 3192  | 3031  | 58.1           | 33.7                | 0.14          | N, 11   |
| L10                                                                                                                                                                                              |       | 87.93         | 50.06         | 0.18±0.02             | cirque-hanging     | 2822  | 3150  | 2964  | 58.4           | 31.9                | 0.22          | N, 8    |
| L11                                                                                                                                                                                              |       | 87.92         | 50.06         | 0.14±0.02             | cirque-hanging     | 2842  | 3189  | 3013  | 58.3           | 33.6                | 0.18          | NE, 49  |
| L12                                                                                                                                                                                              |       | 87.91         | 50.05         | 0.40±0.03             | cirque-hanging     | 2768  | 3225  | 2983  | 56.8           | 34.4                | 0.50          | N, 12   |
| L13                                                                                                                                                                                              |       | 87.90         | 50.05         | 0.08±0.01             | hanging            | 2845  | 3228  | 3066  | 50.8           | 37.8                | 0.11          | NE, 66  |

|                                                                                                                                                                                                                        |                              |       |       |            |                |      |      |      |      |      |       |         |
|------------------------------------------------------------------------------------------------------------------------------------------------------------------------------------------------------------------------|------------------------------|-------|-------|------------|----------------|------|------|------|------|------|-------|---------|
| 11                                                                                                                                                                                                                     |                              | 87.86 | 50.06 | 0.78±0.04  | flat summit    | 3281 | 3450 | 3376 | 34.7 | 12.3 | 0.80  | N, 357  |
| 12-14                                                                                                                                                                                                                  |                              | 87.88 | 50.06 | 1.22±0.06  | valley         | 2641 | 3432 | 3070 | 56.7 | 24.9 | 1.40  | NE, 24  |
| 13                                                                                                                                                                                                                     |                              | 87.89 | 50.06 | 0.53±0.03  | cirque         | 2893 | 3359 | 3079 | 58.9 | 24.7 | 0.60  | N, 347  |
| L14                                                                                                                                                                                                                    |                              | 87.83 | 50.05 | 0.44±0.03  | slope          | 3141 | 3325 | 3243 | 35.0 | 13.5 | 0.45  | NW, 332 |
| 15                                                                                                                                                                                                                     | Tete                         | 87.81 | 50.05 | 1.57±0.07  | valley         | 2653 | 3481 | 2978 | 65.7 | 28.3 | 1.88  | NE, 38  |
| 16                                                                                                                                                                                                                     |                              | 87.81 | 50.06 | 1.92±0.07  | cirque         | 2781 | 3551 | 3073 | 55.0 | 20.4 | 2.11  | NE, 48  |
| L15                                                                                                                                                                                                                    |                              | 87.82 | 50.08 | 0.62±0.03  | flat summit    | 3190 | 3349 | 3280 | 32.4 | 14.0 | 0.65  | W, 276  |
| In total, in the basin of the Tete river 15 glaciers with total area of 8.92±0.53 km <sup>2</sup> have been reconstructed, minimal altitude is 2641 m, maximal altitude is 3551 m, area weighted average ELA is 3099 m |                              |       |       |            |                |      |      |      |      |      |       |         |
| Aktru river basin                                                                                                                                                                                                      |                              |       |       |            |                |      |      |      |      |      |       |         |
| L16                                                                                                                                                                                                                    |                              | 87.84 | 50.08 | 0.38±0.04  | cirque-hanging | 2664 | 3323 | 2970 | 59.7 | 36.6 | 0.49  | NE, 50  |
| L17                                                                                                                                                                                                                    |                              | 87.83 | 50.09 | 0.15±0.02  | hanging        | 2811 | 3308 | 3116 | 48.8 | 35.9 | 0.18  | N, 6    |
| L18                                                                                                                                                                                                                    |                              | 87.82 | 50.09 | 0.04±0.01  | hanging        | 2788 | 3059 | 2934 | 42.4 | 35.9 | 0.06  | NE, 25  |
| 17                                                                                                                                                                                                                     |                              | 87.79 | 50.06 | 1.92±0.07  | slope          | 2881 | 3551 | 3187 | 47.3 | 17.1 | 2.02  | N, 344  |
| 18-19                                                                                                                                                                                                                  | Malyi Aktru                  | 87.76 | 50.05 | 4.95±0.17  | valley         | 2189 | 3708 | 2824 | 66.4 | 22.3 | 5.74  | N, 21   |
| 20-25                                                                                                                                                                                                                  | Pravyi Aktru and Levyi Aktru | 87.69 | 50.08 | 13.65±0.52 | valley         | 2300 | 3970 | 2801 | 72.2 | 25.3 | 18.49 | E, 70   |
| 26                                                                                                                                                                                                                     |                              | 87.72 | 50.09 | 0.34±0.02  | cirque-hanging | 3196 | 3566 | 3313 | 40.5 | 24.7 | 0.38  | E, 88   |
| L19                                                                                                                                                                                                                    |                              | 87.73 | 50.09 | 0.26±0.03  | cirque         | 2932 | 3329 | 3138 | 49.9 | 30.3 | 0.31  | W, 261  |
| L20                                                                                                                                                                                                                    |                              | 87.75 | 50.09 | 0.09±0.02  | cirque         | 2862 | 3225 | 3033 | 62.2 | 40.3 | 0.12  | E, 90   |
| L21                                                                                                                                                                                                                    |                              | 87.75 | 50.09 | 0.06±0.01  | cirque         | 3008 | 3153 | 3065 | 46.4 | 26.3 | 0.06  | N, 16   |
| 27                                                                                                                                                                                                                     | Kysyl-Tash                   | 87.75 | 50.09 | 1.20±0.08  | cirque-valley  | 2699 | 3442 | 2996 | 61.6 | 27.6 | 1.43  | NE, 49  |
| 28-30                                                                                                                                                                                                                  | Yan-Karasu                   | 87.71 | 50.10 | 3.46±0.14  | valley         | 2577 | 3960 | 2847 | 68.2 | 25.7 | 4.06  | NE, 65  |
| L22                                                                                                                                                                                                                    |                              | 87.72 | 50.11 | 0.13±0.01  | cirque         | 2803 | 3113 | 2931 | 63.1 | 33.8 | 0.16  | N, 21   |
| 31                                                                                                                                                                                                                     | Malyi Korumdu                | 87.71 | 50.11 | 1.31±0.09  | valley         | 2582 | 3715 | 2818 | 63.6 | 29.5 | 1.57  | NE, 34  |
| 32-33                                                                                                                                                                                                                  | Korumdu                      | 87.68 | 50.12 | 9.22±0.47  | valley         | 2194 | 3967 | 2755 | 64.7 | 29.7 | 13.28 | NE, 50  |
| L23                                                                                                                                                                                                                    |                              | 87.66 | 50.14 | 0.22±0.02  | cirque         | 2900 | 3282 | 3059 | 55.0 | 30.1 | 0.26  | NE, 47  |
| L24                                                                                                                                                                                                                    |                              | 87.66 | 50.14 | 0.24±0.03  | cirque         | 2759 | 3278 | 2953 | 53.3 | 35.0 | 0.31  | NE, 58  |
| 34-35                                                                                                                                                                                                                  | Kurkurek                     | 87.64 | 50.14 | 4.18±0.16  | valley         | 2456 | 3967 | 2836 | 64.2 | 30.2 | 5.27  | N, 18   |
| 36                                                                                                                                                                                                                     |                              | 87.61 | 50.15 | 2.33±0.15  | valley         | 2482 | 3624 | 2826 | 64.0 | 23.9 | 2.72  | N, 20   |
| 37                                                                                                                                                                                                                     |                              | 87.60 | 50.16 | 0.89±0.05  | cirque-valley  | 2767 | 3495 | 3020 | 67.4 | 25.7 | 1.04  | N, 16   |

In total, in the basin of the Aktru river 20 glaciers with total area of 45.02±2.25 km<sup>2</sup> are reconstructed, minimal altitude is 2189 m, maximal altitude is 3970 m, area weighted average ELA is 2840

| Maashei river basin |                 |       |       |            |               |      |      |      |      |      |       |         |
|---------------------|-----------------|-------|-------|------------|---------------|------|------|------|------|------|-------|---------|
| 38                  |                 | 87.61 | 50.14 | 0.67±0.06  | flat summit   | 3355 | 3629 | 3526 | 39.2 | 14.5 | 0.70  | SW, 236 |
| 39                  |                 | 87.63 | 50.13 | 2.73±0.16  | valley        | 2402 | 3909 | 3062 | 63.8 | 28.7 | 3.68  | W, 292  |
| 40-43               | Pravyi Maashei  | 87.64 | 50.11 | 6.51±0.29  | valley        | 2413 | 3965 | 3045 | 74.8 | 30.0 | 8.54  | W, 254  |
| L25                 |                 | 87.63 | 50.10 | 0.23±0.03  | hanging       | 2901 | 3494 | 3245 | 70.1 | 44.2 | 0.34  | W, 280  |
| 44-45               |                 | 87.66 | 50.09 | 0.83±0.05  | slope         | 2903 | 3963 | 3387 | 76.7 | 40.3 | 1.28  | S, 202  |
| 46-48               | Bolshoi Maashei | 87.63 | 50.08 | 17.49±0.52 | valley        | 2196 | 4107 | 2711 | 69.8 | 22.7 | 21.77 | N, 349  |
| 49-55               | Levyi Maashei   | 87.55 | 50.08 | 10.10±0.34 | cirque-valley | 2446 | 4110 | 3041 | 64.5 | 25.5 | 12.27 | NE, 35  |
| 56                  |                 | 87.56 | 50.10 | 0.27±0.02  | cirque        | 2864 | 3338 | 3142 | 64.8 | 32.2 | 0.34  | E, 69   |
| 57-59               |                 | 87.53 | 50.10 | 1.99±0.13  | cirque-valley | 2634 | 3496 | 3014 | 65.9 | 30.3 | 2.44  | NE, 48  |
| 60-63               |                 | 87.51 | 50.12 | 2.77±0.19  | cirque-valley | 2576 | 3571 | 3012 | 66.1 | 26.7 | 3.41  | NE, 56  |
| 64                  |                 | 87.53 | 50.14 | 0.91±0.08  | cirque-valley | 2715 | 3412 | 2957 | 55.8 | 29.9 | 1.10  | E, 80   |
| 65-67               |                 | 87.52 | 50.15 | 1.59±0.12  | cirque-valley | 2583 | 3529 | 2971 | 65.3 | 31.7 | 2.10  | N, 19   |
| 68                  |                 | 87.51 | 50.16 | 0.65±0.05  | valley        | 2619 | 3313 | 2898 | 59.5 | 26.7 | 0.76  | NE, 28  |
| 69-72               |                 | 87.49 | 50.14 | 6.41±0.35  | valley        | 2409 | 3661 | 2742 | 61.2 | 26.2 | 8.05  | N, 347  |
| 73                  |                 | 87.47 | 50.15 | 0.38±0.04  | cirque-valley | 2669 | 3204 | 2872 | 74.4 | 30.2 | 0.47  | N, 16   |
| L26                 |                 | 87.46 | 50.16 | 0.11±0.01  | hanging       | 2939 | 3249 | 3114 | 48.9 | 36.3 | 0.13  | E, 101  |
| L27                 |                 | 87.46 | 50.17 | 0.19±0.02  | cirque        | 2827 | 3230 | 2963 | 64.0 | 32.1 | 0.24  | E, 71   |
| L28                 |                 | 87.48 | 50.18 | 0.81±0.08  | cirque        | 2565 | 3166 | 2795 | 61.3 | 26.3 | 0.97  | NE, 44  |
| L29                 |                 | 87.47 | 50.18 | 0.19±0.02  | cirque        | 2711 | 2939 | 2811 | 52.5 | 26.3 | 0.21  | NE, 29  |

In total, in the basin of the Maashei 19 glaciers with total area of 54.83±2.56 km<sup>2</sup> are reconstructed, minimal altitude 2196 m, maximal altitude 4110 m, area weighted average ELA is 2902 m.

| Shavly river basin |  |       |       |           |               |      |      |      |      |      |      |         |
|--------------------|--|-------|-------|-----------|---------------|------|------|------|------|------|------|---------|
| 74                 |  | 87.46 | 50.18 | 0.70±0.04 | cirque        | 2897 | 3152 | 3000 | 43.2 | 16.0 | 0.74 | NW, 329 |
| 75                 |  | 87.45 | 50.17 | 0.72±0.06 | cirque-valley | 2553 | 3247 | 2813 | 67.6 | 27.0 | 0.85 | N, 348  |
| 76-82              |  | 87.45 | 50.15 | 3.53±0.24 | valley        | 2461 | 3404 | 2810 | 60.6 | 26.7 | 4.37 | N, 349  |
| L30                |  | 87.42 | 50.15 | 0.06±0.01 | hanging       | 2859 | 3226 | 3060 | 48.1 | 37.4 | 0.08 | N, 341  |
| L31                |  | 87.42 | 50.15 | 0.05±0.01 | hanging       | 2798 | 3140 | 2996 | 44.8 | 35.1 | 0.07 | N, 341  |
| L32                |  | 87.45 | 50.14 | 0.06±0.01 | hanging       | 3134 | 3374 | 3327 | 56.5 | 22.6 | 0.07 | SW, 216 |

|         |  |       |       |            |                |      |      |      |      |      |      |         |
|---------|--|-------|-------|------------|----------------|------|------|------|------|------|------|---------|
| L33     |  | 87.45 | 50.13 | 0.04±0.01  | hanging        | 2900 | 3119 | 3035 | 47.2 | 34.6 | 0.04 | NW, 311 |
| L34     |  | 87.44 | 50.13 | 0.04±0.01  | hanging        | 2897 | 3139 | 3057 | 42.6 | 33.7 | 0.05 | NW, 317 |
| L35     |  | 87.46 | 50.13 | 0.10±0.01  | cirque-hanging | 2869 | 3241 | 3072 | 51.4 | 36.4 | 0.13 | SW, 245 |
| L36     |  | 87.47 | 50.13 | 0.13±0.01  | cirque-hanging | 2961 | 3259 | 3111 | 45.1 | 33.6 | 0.15 | SE, 149 |
| 83-84   |  | 87.48 | 50.13 | 0.60±0.08  | cirque-valley  | 2758 | 3667 | 3128 | 67.2 | 36.0 | 0.77 | W, 270  |
| 85      |  | 87.48 | 50.12 | 0.10±0.02  | hanging        | 3267 | 3664 | 3487 | 49.3 | 39.2 | 0.13 | SW, 203 |
| L37     |  | 87.49 | 50.12 | 0.08±0.01  | hanging        | 3268 | 3664 | 3513 | 52.7 | 36.1 | 0.10 | SW, 208 |
| L38     |  | 87.49 | 50.12 | 0.10±0.01  | hanging        | 3306 | 3576 | 3439 | 41.1 | 32.8 | 0.12 | S, 180  |
| L39     |  | 87.49 | 50.12 | 0.02±0.01  | hanging        | 3146 | 3299 | 3225 | 37.0 | 32.4 | 0.02 | SW, 207 |
| L40     |  | 87.49 | 50.12 | 0.03±0.01  | hanging        | 3127 | 3265 | 3189 | 38.4 | 30.8 | 0.03 | SE, 135 |
| 86-90   |  | 87.48 | 50.11 | 5.30±0.36  | cirque-valley  | 2431 | 3716 | 3006 | 76.8 | 30.7 | 8.21 | N, 350  |
| 91      |  | 87.47 | 50.10 | 0.10±0.02  | hanging        | 3539 | 3721 | 3630 | 54.3 | 27.8 | 0.12 | S, 171  |
| L41     |  | 87.46 | 50.10 | 0.02±0.01  | hanging        | 3271 | 3665 | 3482 | 69.5 | 57.5 | 0.04 | SW, 243 |
| L42     |  | 87.46 | 50.10 | 0.04±0.01  | hanging        | 3275 | 3524 | 3524 | 61.0 | 40.9 | 0.06 | W, 248  |
| L43     |  | 87.47 | 50.09 | 0.33±0.03  | cirque         | 2680 | 3214 | 2905 | 49.6 | 34.2 | 0.40 | S, 175  |
| L44     |  | 87.49 | 50.09 | 0.20±0.03  | hanging        | 2967 | 3671 | 3302 | 51.7 | 36.2 | 0.25 | S; 196  |
| L45     |  | 87.50 | 50.09 | 0.06±0.01  | hanging        | 3006 | 3224 | 3105 | 49.7 | 35.0 | 0.08 | E, 86   |
| 92      |  | 87.52 | 50.09 | 0.03±<0.01 | slope          | 3362 | 3447 | 3404 | 41.8 | 23.7 | 0.03 | SW, 242 |
| 93-98   |  | 87.51 | 50.08 | 3.95±0.23  | valley         | 2624 | 3795 | 2898 | 68.2 | 29.8 | 5.54 | NW, 305 |
| 99      |  | 87.49 | 50.08 | 0.33±0.04  | hanging        | 2542 | 3530 | 2998 | 59.8 | 34.9 | 0.43 | N, 355  |
| 100     |  | 87.50 | 50.06 | 0.28±0.04  | cirque-hanging | 2978 | 3800 | 3475 | 56.9 | 39.4 | 0.37 | SW, 247 |
| 101     |  | 87.50 | 50.06 | 0.06±0.01  | hanging        | 3060 | 3513 | 3350 | 48.4 | 41.5 | 0.08 | W, 261  |
| 102     |  | 87.48 | 50.05 | 3.25±0.19  | valley         | 2529 | 3489 | 2798 | 58.9 | 22.5 | 3.72 | NW, 337 |
| 103     |  | 87.46 | 50.05 | 2.50±0.11  | cirque-valley  | 2365 | 3699 | 2812 | 69.2 | 27.8 | 3.10 | N, 358  |
| 104-106 |  | 87.43 | 50.06 | 5.36±0.28  | valley         | 2211 | 3674 | 2639 | 67.1 | 26.8 | 6.70 | NE, 34  |
| 107     |  | 87.41 | 50.06 | 0.03±0.01  | hanging        | 3173 | 3254 | 3215 | 33.4 | 18.8 | 0.03 | S, 168  |
| L46     |  | 87.43 | 50.07 | 0.03±0.01  | hanging        | 2694 | 3139 | 2958 | 61.0 | 45.2 | 0.05 | N, 0    |
| L47     |  | 87.43 | 50.07 | 0.04±0.01  | hanging        | 2736 | 3160 | 2997 | 55.8 | 41.9 | 0.05 | NE, 41  |
| L48     |  | 87.43 | 50.08 | 0.05±0.01  | hanging        | 2741 | 3102 | 2928 | 51.8 | 44.4 | 0.07 | NE, 58  |
| 108-110 |  | 87.42 | 50.07 | 1.56±0.10  | valley         | 2344 | 3251 | 2799 | 63.7 | 23.9 | 1.78 | N, 352  |
| 111-112 |  | 87.39 | 50.07 | 4.26±0.22  | valley         | 2157 | 3642 | 2559 | 63.7 | 26.5 | 5.39 | NE, 25  |

|                                                                                                                                                                                                                 |  |       |       |           |                |      |      |      |      |      |      |         |
|-----------------------------------------------------------------------------------------------------------------------------------------------------------------------------------------------------------------|--|-------|-------|-----------|----------------|------|------|------|------|------|------|---------|
| 113                                                                                                                                                                                                             |  | 87.39 | 50.08 | 0.40±0.06 | valley         | 2376 | 3350 | 2675 | 61.3 | 32.1 | 0.50 | NE, 53  |
| 114                                                                                                                                                                                                             |  | 87.38 | 50.09 | 0.08±0.02 | hanging        | 2775 | 3290 | 3105 | 62.0 | 37.1 | 0.11 | N, 22   |
| 115                                                                                                                                                                                                             |  | 87.38 | 50.07 | 0.69±0.05 | valley         | 2755 | 3322 | 2957 | 50.6 | 25.6 | 0.78 | NW, 319 |
| 116-117                                                                                                                                                                                                         |  | 87.36 | 50.08 | 2.80±0.14 | valley         | 2475 | 3597 | 2794 | 64.0 | 26.2 | 3.25 | N, 17   |
| L49                                                                                                                                                                                                             |  | 87.34 | 50.08 | 0.06±0.01 | cirque-hanging | 2922 | 3183 | 3096 | 49.5 | 35.1 | 0.08 | E, 68   |
| L50                                                                                                                                                                                                             |  | 87.35 | 50.09 | 0.06±0.01 | hanging        | 2647 | 3110 | 2893 | 52.0 | 38.9 | 0.07 | NE,44   |
| In total, in the basin of the Shavly river 43 glaciers are reconstructed with the total area of 38.23±2.56 km <sup>2</sup> , minimal altitude 2157 m, maximal altitude 3800 m, area weighted average ELA 2823 m |  |       |       |           |                |      |      |      |      |      |      |         |
| Yungur river basin                                                                                                                                                                                              |  |       |       |           |                |      |      |      |      |      |      |         |
| L51                                                                                                                                                                                                             |  | 87.34 | 50.08 | 0.58±0.06 | valley         | 2603 | 3323 | 2915 | 60.9 | 32.9 | 0.72 | NW, 310 |
| L52                                                                                                                                                                                                             |  | 87.32 | 50.07 | 0.01±0.01 | hanging        | 2973 | 3177 | 3120 | 46.2 | 39.3 | 0.01 | N, 17   |
| L53                                                                                                                                                                                                             |  | 87.32 | 50.07 | 0.03±0.01 | cirque-hanging | 2917 | 3185 | 3086 | 62.8 | 40.1 | 0.04 | N, 12   |
| L54                                                                                                                                                                                                             |  | 87.29 | 50.07 | 1.04±0.13 | cirque-valley  | 2312 | 3175 | 2693 | 57.3 | 34.3 | 1.30 | N, 338  |
| L55                                                                                                                                                                                                             |  | 87.29 | 50.06 | 0.05±0.01 | hanging        | 3026 | 3267 | 3179 | 51.1 | 37.7 | 0.06 | NW, 335 |
| L56                                                                                                                                                                                                             |  | 87.28 | 50.06 | 0.03±0.01 | hanging        | 3003 | 3231 | 3158 | 51.0 | 37.3 | 0.04 | NW, 317 |
| L57                                                                                                                                                                                                             |  | 87.28 | 50.05 | 0.03±0.01 | hanging        | 2982 | 3216 | 3129 | 46.4 | 34.9 | 0.04 | W, 279  |
| L58                                                                                                                                                                                                             |  | 87.29 | 50.05 | 0.10±0.01 | cirque-valley  | 2904 | 3224 | 3063 | 47.7 | 33.7 | 0.12 | E, 109  |
| L59                                                                                                                                                                                                             |  | 87.30 | 50.06 | 0.07±0.01 | cirque         | 3009 | 3314 | 3178 | 51.2 | 41.2 | 0.09 | E, 91   |
| 118-121                                                                                                                                                                                                         |  | 87.36 | 50.06 | 2.00±0.14 | cirque-valley  | 2614 | 3638 | 2992 | 68.1 | 28.7 | 2.47 | NW, 312 |
| L60                                                                                                                                                                                                             |  | 87.36 | 50.05 | 0.38±0.03 | cirque-valley  | 2763 | 3233 | 3007 | 55.7 | 31.4 | 0.46 | SW, 229 |
| L61                                                                                                                                                                                                             |  | 87.36 | 50.04 | 0.04±0.01 | hanging        | 2951 | 3276 | 3198 | 52.8 | 34.3 | 0.05 | N, 8    |
| L62                                                                                                                                                                                                             |  | 87.35 | 50.04 | 0.05±0.01 | hanging        | 2906 | 3271 | 3201 | 56.2 | 31.5 | 0.07 | NW, 334 |
| L63                                                                                                                                                                                                             |  | 87.35 | 50.04 | 0.06±0.01 | hanging        | 2908 | 3268 | 3204 | 54.4 | 29.3 | 0.07 | N, 21   |
| L64                                                                                                                                                                                                             |  | 87.33 | 50.03 | 0.02±0.01 | hanging        | 2950 | 3113 | 3022 | 54.2 | 35.9 | 0.02 | NW, 325 |
| L65                                                                                                                                                                                                             |  | 87.33 | 50.03 | 0.03±0.01 | cirque-hanging | 2918 | 3096 | 3025 | 45.7 | 35.8 | 0.03 | N, 360  |
| L66                                                                                                                                                                                                             |  | 87.32 | 50.03 | 0.03±0.01 | hanging        | 2981 | 3208 | 3097 | 58.5 | 42.7 | 0.04 | NE, 24  |
| L67                                                                                                                                                                                                             |  | 87.32 | 50.03 | 0.02±0.01 | hanging        | 2963 | 3186 | 3087 | 63.9 | 41.8 | 0.03 | NW, 332 |
| L68                                                                                                                                                                                                             |  | 87.32 | 50.03 | 0.02±0.00 | cirque-hanging | 3055 | 3171 | 3123 | 38.8 | 30.3 | 0.02 | SW, 231 |
| L69                                                                                                                                                                                                             |  | 87.35 | 50.04 | 0.03±0.01 | cirque         | 3088 | 3144 | 3122 | 31.7 | 18.2 | 0.03 | SE, 144 |
| L70                                                                                                                                                                                                             |  | 87.35 | 50.03 | 0.10±0.01 | cirque-hanging | 2807 | 3190 | 3001 | 58.3 | 35.8 | 0.13 | NW, 296 |
| L71                                                                                                                                                                                                             |  | 87.35 | 50.03 | 0.08±0.01 | hanging        | 2995 | 3283 | 3168 | 50.7 | 31.4 | 0.10 | NW, 328 |

|         |  |       |       |           |                |      |      |      |      |      |      |         |
|---------|--|-------|-------|-----------|----------------|------|------|------|------|------|------|---------|
| L72     |  | 87.35 | 50.02 | 0.19±0.02 | cirque-valley  | 2943 | 3388 | 3125 | 55.9 | 31.4 | 0.23 | E, 76   |
| L73     |  | 87.35 | 50.03 | 0.15±0.02 | cirque         | 2889 | 3178 | 3031 | 49.5 | 31.4 | 0.18 | E, 80   |
| L74     |  | 87.35 | 50.04 | 0.09±0.01 | cirque         | 2951 | 3232 | 3048 | 56.8 | 32.1 | 0.11 | SE, 131 |
| L75     |  | 87.37 | 50.03 | 0.05±0.01 | hanging        | 2796 | 3136 | 3017 | 66.5 | 44.4 | 0.08 | NE, 44  |
| L76     |  | 87.36 | 50.03 | 0.07±0.01 | cirque-hanging | 2824 | 3223 | 3049 | 64.1 | 45.1 | 0.11 | NE, 44  |
| L77     |  | 87.36 | 50.04 | 0.03±0.01 | cirque         | 2990 | 3165 | 3057 | 44.8 | 35.1 | 0.03 | NE, 45  |
| L78     |  | 87.37 | 50.04 | 0.03±0.01 | cirque         | 2820 | 2974 | 2899 | 54.8 | 31.2 | 0.04 | E, 74   |
| L79     |  | 87.37 | 50.05 | 0.29±0.03 | cirque-valley  | 2824 | 3364 | 3004 | 59.9 | 22.1 | 0.32 | SE, 137 |
| 122-123 |  | 87.38 | 50.05 | 1.59±0.07 | cirque         | 2804 | 3426 | 3030 | 51.8 | 23.2 | 1.77 | S, 179  |
| 124     |  | 87.40 | 50.05 | 1.48±0.07 | cirque-valley  | 2713 | 3421 | 3043 | 57.7 | 23.0 | 1.67 | W, 256  |
| 125-126 |  | 87.42 | 50.04 | 3.10±0.18 | cirque-valley  | 2542 | 3454 | 3016 | 69.9 | 26.0 | 3.62 | W, 270  |
| L80     |  | 87.41 | 50.02 | 0.58±0.05 | cirque-valley  | 2763 | 3408 | 3129 | 63.7 | 32.6 | 0.74 | W, 290  |
| L81     |  | 87.40 | 50.01 | 0.05±0.01 | hanging        | 2651 | 3106 | 2929 | 50.6 | 40.6 | 0.07 | W, 268  |
| L82     |  | 87.41 | 50.01 | 0.14±0.02 | cirque         | 3002 | 3299 | 3162 | 43.5 | 25.8 | 0.15 | SW, 217 |
| L83     |  | 87.41 | 50.00 | 0.05±0.01 | hanging        | 2983 | 3254 | 3152 | 56.3 | 34.2 | 0.07 | NW, 308 |
| L84     |  | 87.41 | 50.00 | 0.03±0.01 | hanging        | 3061 | 3258 | 3170 | 59.3 | 38.2 | 0.04 | SW, 234 |
| 127     |  | 87.40 | 49.98 | 0.81±0.07 | cirque-valley  | 2560 | 3220 | 2857 | 63.1 | 28.4 | 0.98 | N, 340  |
| L85     |  | 87.40 | 49.99 | 0.05±0.01 | hanging        | 2787 | 3095 | 2956 | 69.5 | 38.0 | 0.07 | N, 348  |
| 128     |  | 87.39 | 49.99 | 0.12±0.02 | hanging        | 2639 | 3181 | 3009 | 64.9 | 33.5 | 0.15 | N, 357  |
| 129-131 |  | 87.37 | 49.98 | 2.23±0.17 | cirque-valley  | 2362 | 3356 | 2855 | 61.5 | 30.5 | 2.74 | N, 4    |
| L86     |  | 87.36 | 49.98 | 0.04±0.01 | hanging        | 2770 | 3105 | 2963 | 47.7 | 37.7 | 0.05 | NE, 34  |
| L87     |  | 87.35 | 49.98 | 0.40±0.03 | valley         | 2654 | 3286 | 2929 | 68.4 | 34.0 | 0.51 | NE, 42  |
| L88     |  | 87.36 | 49.99 | 0.05±0.01 | hanging        | 2657 | 2884 | 2787 | 56.7 | 33.4 | 0.06 | N, 18   |
| L89     |  | 87.35 | 49.99 | 0.02±0.01 | hanging        | 2809 | 3008 | 2938 | 45.9 | 36.1 | 0.02 | N, 16   |
| L90     |  | 87.35 | 49.99 | 0.02±0.01 | hanging        | 2795 | 2969 | 2915 | 51.5 | 35.7 | 0.02 | N, 8    |
| L91     |  | 87.35 | 49.99 | 0.02±0.01 | hanging        | 2726 | 2931 | 2878 | 52.4 | 32.2 | 0.02 | N, 344  |
| L92     |  | 87.34 | 49.99 | 0.04±0.01 | hanging        | 2564 | 2863 | 2739 | 63.1 | 44.3 | 0.05 | N, 353  |
| L93     |  | 87.35 | 49.98 | 0.15±0.02 | valley         | 2663 | 3196 | 2902 | 59.8 | 35.9 | 0.19 | NW, 334 |
| 132-134 |  | 87.33 | 49.97 | 2.49±0.21 | cirque         | 2431 | 3447 | 2877 | 65.4 | 32.3 | 3.17 | N, 354  |
| L94     |  | 87.32 | 49.98 | 0.21±0.03 | cirque         | 2544 | 3027 | 2790 | 61.2 | 36.5 | 0.27 | N, 22   |
| L95     |  | 87.32 | 49.99 | 0.04±0.01 | hanging        | 2653 | 2946 | 2799 | 57.6 | 43.2 | 0.05 | NE, 64  |

|         |  |       |       |           |                |      |      |      |      |      |      |         |
|---------|--|-------|-------|-----------|----------------|------|------|------|------|------|------|---------|
| L96     |  | 87.32 | 49.99 | 0.44±0.06 | cirque-valley  | 2307 | 3001 | 2664 | 62.2 | 34.5 | 0.55 | N, 354  |
| L97     |  | 87.32 | 50.00 | 0.02±0.01 | cirque-hanging | 2219 | 2417 | 2341 | 62.0 | 40.1 | 0.03 | N, 9    |
| L98     |  | 87.31 | 50.00 | 0.03±0.01 | cirque-hanging | 2393 | 2625 | 2539 | 56.5 | 36.9 | 0.04 | N, 6    |
| L99     |  | 87.31 | 50.00 | 0.04±0.01 | hanging        | 2471 | 2785 | 2640 | 56.3 | 40.7 | 0.05 | N, 347  |
| 135     |  | 87.31 | 49.98 | 0.82±0.09 | cirque-valley  | 2538 | 3272 | 2838 | 65.0 | 27.1 | 0.98 | N, 352  |
| L100    |  | 87.30 | 49.98 | 0.07±0.01 | hanging        | 2736 | 3121 | 2920 | 65.3 | 36.6 | 0.09 | N, 356  |
| 136     |  | 87.29 | 49.97 | 0.75±0.07 | cirque-valley  | 2669 | 3273 | 2972 | 58.6 | 22.8 | 0.83 | N, 348  |
| L99     |  | 87.28 | 49.98 | 0.56±0.07 | valley         | 2643 | 3183 | 2884 | 70.0 | 31.0 | 0.72 | NE, 49  |
| L102    |  | 87.29 | 49.99 | 0.26±0.03 | cirque         | 2621 | 3152 | 2884 | 60.8 | 37.7 | 0.33 | NE, 44  |
| L103    |  | 87.29 | 50.00 | 0.03±0.01 | hanging        | 2863 | 3061 | 2983 | 43.5 | 34.2 | 0.04 | E, 91   |
| L104    |  | 87.29 | 50.00 | 0.05±0.01 | hanging        | 2661 | 2941 | 2815 | 48.7 | 35.6 | 0.06 | NE, 49  |
| L105    |  | 87.28 | 50.00 | 0.17±0.02 | hanging        | 2670 | 3119 | 2900 | 51.2 | 34.2 | 0.21 | NE, 40  |
| L106    |  | 87.28 | 50.01 | 0.03±0.01 | hanging        | 2543 | 2873 | 2746 | 58.9 | 41.8 | 0.04 | NE, 38  |
| L107    |  | 87.27 | 49.99 | 0.02±0.01 | hanging        | 2853 | 3048 | 2972 | 48.0 | 28.8 | 0.03 | N, 8    |
| L108    |  | 87.26 | 49.99 | 0.20±0.02 | hanging        | 2684 | 3109 | 2878 | 62.4 | 39.7 | 0.26 | N, 8    |
| L109    |  | 87.26 | 50.00 | 0.14±0.02 | cirque         | 2607 | 3127 | 2857 | 66.8 | 39.6 | 0.19 | NE, 45  |
| L110    |  | 87.25 | 50.00 | 0.05±0.01 | hanging        | 2821 | 3118 | 2989 | 52.2 | 37.5 | 0.07 | N,1     |
| L111    |  | 87.24 | 50.01 | 0.04±0.01 | hanging        | 2927 | 3151 | 3056 | 47.6 | 36.2 | 0.05 | N, 349  |
| L112    |  | 87.23 | 50.01 | 0.18±0.02 | hanging        | 2671 | 3033 | 2872 | 51.9 | 31.5 | 0.22 | NE, 27  |
| L113    |  | 87.23 | 50.01 | 0.04±0.01 | hanging        | 2750 | 2979 | 2887 | 49.1 | 35.6 | 0.05 | N, 342  |
| L114    |  | 87.28 | 49.97 | 0.12±0.02 | cirque         | 2810 | 3107 | 2933 | 49.5 | 32.3 | 0.14 | N, 342  |
| L115    |  | 87.28 | 49.97 | 0.06±0.01 | cirque         | 2741 | 2948 | 2834 | 49.8 | 31.2 | 0.08 | N, 358  |
| 137-138 |  | 87.27 | 49.97 | 0.99±0.07 | cirque         | 2657 | 3209 | 2874 | 68.0 | 28.1 | 1.18 | N, 354  |
| 139-140 |  | 87.25 | 49.96 | 1.17±0.09 | valley         | 2471 | 3404 | 2720 | 64.1 | 27.2 | 1.43 | NW, 337 |
| 140-142 |  | 87.24 | 49.96 | 1.22±0.08 | cirque-valley  | 2511 | 3378 | 2874 | 64.4 | 32.3 | 1.57 | N, 350  |
| 143     |  | 87.22 | 49.96 | 1.53±0.09 | valley         | 2525 | 3346 | 2801 | 67.2 | 23.8 | 1.76 | N, 15   |
| 144-145 |  | 87.21 | 49.96 | 1.04±0.08 | valley         | 2546 | 3290 | 2789 | 79.0 | 29.6 | 1.29 | NE, 32  |
| L116    |  | 87.20 | 49.97 | 0.14±0.01 | hanging        | 2799 | 3220 | 3059 | 62.1 | 37.6 | 0.19 | E, 94   |
| 146     |  | 87.20 | 49.98 | 0.41±0.03 | cirque-valley  | 2623 | 3239 | 2915 | 68.3 | 36.1 | 0.53 | N, 19   |
| L117    |  | 87.19 | 49.99 | 0.05±0.01 | hanging        | 2895 | 3167 | 3063 | 48.5 | 36.3 | 0.06 | N, 346  |
| 147-148 |  | 87.18 | 49.96 | 1.30±0.08 | cirque-valley  | 2598 | 3332 | 2957 | 64.7 | 28.7 | 1.56 | N, 359  |

|         |  |       |       |           |                |      |      |      |      |      |      |         |
|---------|--|-------|-------|-----------|----------------|------|------|------|------|------|------|---------|
| 149-151 |  | 87.17 | 49.96 | 0.60±0.05 | cirque         | 2602 | 3525 | 3036 | 75.5 | 41.3 | 0.92 | NE, 49  |
| 152     |  | 87.17 | 49.97 | 0.18±0.02 | cirque-valley  | 2720 | 3313 | 2951 | 70.3 | 36.8 | 0.24 | E, 78   |
| L118    |  | 87.17 | 49.97 | 0.03±0.01 | hanging        | 2684 | 3057 | 2876 | 59.6 | 43.3 | 0.04 | N, 3    |
| L119    |  | 87.17 | 49.97 | 0.05±0.01 | hanging        | 2764 | 3267 | 2980 | 65.2 | 47.8 | 0.08 | N, 4    |
| L120    |  | 87.16 | 49.97 | 0.04±0.01 | hanging        | 2773 | 3046 | 2889 | 60.9 | 36.0 | 0.05 | N, 343  |
| L121    |  | 87.16 | 49.97 | 0.05±0.01 | hanging        | 2736 | 2890 | 2827 | 32.7 | 21.1 | 0.06 | N, 14   |
| L122    |  | 87.16 | 49.97 | 0.27±0.03 | cirque-valley  | 2661 | 3183 | 2871 | 59.3 | 30.1 | 0.32 | E, 81   |
| L123    |  | 87.17 | 49.98 | 0.03±0.01 | hanging        | 2653 | 2742 | 2716 | 38.1 | 19.4 | 0.03 | NW, 297 |
| L124    |  | 87.16 | 49.98 | 0.20±0.02 | cirque-valley  | 2638 | 3048 | 2861 | 57.9 | 30.7 | 0.23 | NE, 56  |
| 153-156 |  | 87.15 | 49.98 | 0.68±0.05 | cirque-valley  | 2528 | 3262 | 2903 | 54.9 | 30.1 | 0.81 | N, 10   |
| L125    |  | 87.14 | 49.99 | 0.07±0.01 | cirque         | 2912 | 3171 | 3064 | 54.4 | 33.6 | 0.09 | NE, 32  |
| L126    |  | 87.14 | 50.00 | 0.12±0.01 | cirque         | 2621 | 3130 | 2900 | 62.8 | 42.1 | 0.17 | N, 358  |
| L127    |  | 87.13 | 49.98 | 0.64±0.05 | valley         | 2460 | 3268 | 2786 | 61.8 | 36.9 | 0.83 | N, 360  |
| L128    |  | 87.12 | 49.98 | 0.24±0.03 | cirque-valley  | 2466 | 3256 | 2907 | 71.2 | 42.5 | 0.34 | N, 6    |
| L129    |  | 87.12 | 49.98 | 0.09±0.01 | cirque         | 2736 | 3099 | 2974 | 53.6 | 37.7 | 0.12 | NE, 61  |
| L130    |  | 87.11 | 49.99 | 0.14±0.02 | cirque-valley  | 2598 | 3046 | 2787 | 67.5 | 36.7 | 0.19 | N, 4    |
| L131    |  | 87.14 | 49.97 | 0.44±0.05 | cirque-valley  | 2685 | 3252 | 2995 | 73.5 | 38.2 | 0.59 | NW, 313 |
| L132    |  | 87.16 | 49.96 | 0.24±0.02 | cirque         | 2841 | 3432 | 3102 | 68.7 | 35.5 | 0.31 | W, 285  |
| L133    |  | 87.19 | 49.95 | 0.16±0.02 | cirque         | 2795 | 3098 | 2944 | 54.4 | 34.1 | 0.19 | SE, 150 |
| L134    |  | 87.18 | 49.94 | 0.17±0.02 | cirque-hanging | 2745 | 3125 | 2966 | 60.6 | 33.8 | 0.21 | NW, 317 |
| L135    |  | 87.17 | 49.94 | 0.11±0.01 | cirque         | 2799 | 3182 | 3034 | 58.4 | 39.5 | 0.15 | N, 10   |
| 157     |  | 87.17 | 49.94 | 0.18±0.02 | cirque-hanging | 2665 | 3239 | 3036 | 53.1 | 34.1 | 0.23 | N, 359  |
| L136    |  | 87.16 | 49.94 | 0.07±0.01 | hanging        | 2778 | 3196 | 3044 | 52.2 | 39.8 | 0.09 | N, 10   |
| L137    |  | 87.16 | 49.94 | 0.07±0.01 | hanging        | 2676 | 3122 | 2925 | 62.7 | 41.9 | 0.09 | N, 5    |
| L138    |  | 87.15 | 49.94 | 0.08±0.01 | hanging        | 2709 | 3210 | 3030 | 60.5 | 46.2 | 0.12 | N, 1    |
| L139    |  | 87.15 | 49.95 | 0.06±0.01 | hanging        | 2710 | 3149 | 2924 | 64.1 | 45.4 | 0.09 | N, 359  |
| L140    |  | 87.15 | 49.95 | 0.10±0.02 | hanging        | 2647 | 3203 | 2978 | 62.8 | 38.4 | 0.14 | N, 1    |
| L141    |  | 87.16 | 49.93 | 0.13±0.02 | cirque-hanging | 2850 | 3144 | 2991 | 57.6 | 35.3 | 0.16 | NW, 320 |
| L142    |  | 87.17 | 49.93 | 0.43±0.04 | cirque-valley  | 2723 | 3202 | 2927 | 67.8 | 29.4 | 0.52 | W, 285  |
| L143    |  | 87.14 | 49.92 | 0.06±0.01 | hanging        | 2815 | 3061 | 2948 | 56.2 | 36.9 | 0.07 | N, 350  |
| L144    |  | 87.14 | 49.92 | 0.05±0.01 | hanging        | 2807 | 3050 | 2958 | 54.0 | 35.3 | 0.07 | N, 346  |



|                                                                                                                                                                                                       |  |       |       |           |                |      |      |             |      |      |      |         |
|-------------------------------------------------------------------------------------------------------------------------------------------------------------------------------------------------------|--|-------|-------|-----------|----------------|------|------|-------------|------|------|------|---------|
| L145                                                                                                                                                                                                  |  | 87.12 | 49.91 | 0.02±0.01 | hanging        | 2828 | 3020 | 2945        | 49.1 | 36.0 | 0.03 | N, 6    |
| L146                                                                                                                                                                                                  |  | 87.12 | 49.91 | 0.02±0.01 | hanging        | 2910 | 3066 | 2989        | 45.6 | 38.1 | 0.02 | N, 10   |
| 158-161                                                                                                                                                                                               |  | 87.11 | 49.92 | 1.08±0.07 | valley         | 2590 | 3338 | 2834        | 59.7 | 25.7 | 1.28 | NE, 36  |
| L147                                                                                                                                                                                                  |  | 87.10 | 49.92 | 0.02±0.01 | cirque         | 2921 | 3114 | 3015        | 60.5 | 39.3 | 0.03 | N, 1    |
| L148                                                                                                                                                                                                  |  | 87.10 | 49.92 | 0.03±0.01 | hanging        | 2850 | 3116 | 3022        | 50.1 | 37.7 | 0.04 | N, 354  |
| L149                                                                                                                                                                                                  |  | 87.09 | 49.92 | 0.02±0.01 | hanging        | 2882 | 3092 | 3026        | 56.3 | 36.6 | 0.02 | N, 344  |
| L150                                                                                                                                                                                                  |  | 87.09 | 49.92 | 0.03±0.01 | hanging        | 2878 | 3142 | 3047        | 54.5 | 36.1 | 0.04 | N, 9    |
| 162                                                                                                                                                                                                   |  | 87.07 | 49.92 | 3.09±0.09 | valley         | 2613 | 3431 | 2837        | 63.6 | 24.9 | 3.61 | NE, 34  |
| L151                                                                                                                                                                                                  |  | 87.07 | 49.93 | 0.04±0.01 | hanging        | 2624 | 2921 | 2820        | 61.9 | 37.9 | 0.05 | N, 14   |
| L152                                                                                                                                                                                                  |  | 87.07 | 49.93 | 0.03±0.01 | hanging        | 2746 | 2987 | 2896        | 45.2 | 32.9 | 0.04 | N, 20   |
| L153                                                                                                                                                                                                  |  | 87.07 | 49.93 | 0.02±0.01 | hanging        | 2870 | 3079 | 2991        | 60.5 | 39.6 | 0.03 | NE, 23  |
| L154                                                                                                                                                                                                  |  | 87.06 | 49.93 | 0.02±0.01 | hanging        | 2899 | 3128 | 3057        | 50.9 | 36.7 | 0.02 | NE, 25  |
| 163-165                                                                                                                                                                                               |  | 87.06 | 49.93 | 1.25±0.08 | valley         | 2575 | 3353 | 2812        | 68.0 | 28.3 | 1.52 | NE, 44  |
| 166-168                                                                                                                                                                                               |  | 87.05 | 49.94 | 1.53±0.07 | valley         | 2564 | 3409 | 2791        | 67.2 | 25.4 | 1.79 | NE, 52  |
| L155                                                                                                                                                                                                  |  | 87.08 | 49.96 | 0.02±0.01 | hanging        | 2980 | 3177 | 3107        | 51.3 | 37.4 | 0.02 | N, 341  |
| L156                                                                                                                                                                                                  |  | 87.07 | 49.95 | 0.13±0.02 | cirque         | 2743 | 3148 | 2901        | 66.1 | 34.9 | 0.17 | NW, 326 |
| L157                                                                                                                                                                                                  |  | 87.06 | 49.96 | 0.15±0.02 | cirque         | 2787 | 3075 | 2933        | 46.3 | 30.2 | 0.18 | N, 359  |
| L158                                                                                                                                                                                                  |  | 87.05 | 49.96 | 0.03±0.01 | cirque         | 2864 | 3025 | 2948        | 48.1 | 34.0 | 0.04 | N, 21   |
| L159                                                                                                                                                                                                  |  | 87.05 | 49.96 | 0.06±0.01 | hanging        | 2915 | 3096 | 3004        | 45.3 | 24.4 | 0.07 | NW, 327 |
| 169                                                                                                                                                                                                   |  | 87.03 | 49.95 | 1.41±0.10 | valley         | 2390 | 3354 | 2763        | 62.8 | 25.7 | 1.62 | N, 354  |
| 170                                                                                                                                                                                                   |  | 87.02 | 49.95 | 0.35±0.03 | cirque         | 2587 | 3260 | 2993        | 66.8 | 33.1 | 0.44 | N, 10   |
| 171                                                                                                                                                                                                   |  | 87.01 | 49.95 | 0.05±0.01 | hanging        | 2939 | 3306 | 3166        | 60.1 | 40.0 | 0.07 | N, 12   |
| 172                                                                                                                                                                                                   |  | 87.01 | 49.95 | 0.11±0.01 | cirque-hanging | 2863 | 3263 | 3109        | 59.0 | 40.4 | 0.15 | N, 16   |
| In total, in the basin of the Yungur river 138 glaciers are reconstructed with the total area of 46,67±3,98 km², minimal altitude 2219 m , maximal altitude 3525 m, area weighted average ELA 2902 m. |  |       |       |           |                |      |      |             |      |      |      |         |
| Argut river basin                                                                                                                                                                                     |  |       |       |           |                |      |      |             |      |      |      |         |
| L160                                                                                                                                                                                                  |  | 87.01 | 49.94 | 0.16±0.02 | cirque-hanging | 2939 | 3318 | 3156        | 56.7 | 33.7 | 0.19 | SW, 211 |
| L161                                                                                                                                                                                                  |  | 87.01 | 49.94 | 0.10±0.01 | hanging        | 2913 | 3268 | 3058        | 54.6 | 33.9 | 0.13 | SW, 247 |
| L162                                                                                                                                                                                                  |  | 87.03 | 49.93 | 2.35±0.12 | valley         | 2611 | 3307 | <b>2869</b> | 67.5 | 26.5 | 2.80 | SW, 203 |
| L163                                                                                                                                                                                                  |  | 87.02 | 49.92 | 0.21±0.02 | cirque         | 2650 | 3106 | 2851        | 48.2 | 30.6 | 0.25 | E, 107  |
| L164                                                                                                                                                                                                  |  | 87.05 | 49.92 | 0.33±0.03 | cirque-valley  | 2841 | 3243 | 3064        | 59.5 | 27.4 | 0.39 | S, 167  |

|                                                                                                                                                                                                   |  |       |       |           |                |      |      |             |      |      |      |         |
|---------------------------------------------------------------------------------------------------------------------------------------------------------------------------------------------------|--|-------|-------|-----------|----------------|------|------|-------------|------|------|------|---------|
| L165                                                                                                                                                                                              |  | 87.05 | 49.92 | 0.35±0.04 | cirque-valley  | 2670 | 3327 | 2983        | 61.6 | 35.3 | 0.45 | W, 252  |
| L166                                                                                                                                                                                              |  | 87.05 | 49.91 | 0.34±0.03 | valley         | 2468 | 3336 | <b>2819</b> | 61.6 | 34.0 | 0.42 | SW, 247 |
| L167                                                                                                                                                                                              |  | 87.06 | 49.91 | 0.07±0.01 | cirque         | 3023 | 3310 | 3161        | 55.4 | 37.3 | 0.09 | S, 184  |
| L168                                                                                                                                                                                              |  | 87.07 | 49.91 | 0.84±0.09 | valley         | 2259 | 3203 | 2670        | 60.4 | 33.2 | 1.03 | S, 192  |
| L169                                                                                                                                                                                              |  | 87.08 | 49.91 | 0.34±0.02 | valley         | 2971 | 3342 | 3088        | 54.2 | 25.9 | 0.39 | E, 95   |
| In total, in the basin of the Argut river 10 glaciers are reconstructed with the total area of 5.09±0.39 km², minimal altitude 2259 m, maximal altitude 3342 m, area weighted average ELA 2884 m. |  |       |       |           |                |      |      |             |      |      |      |         |
| Karagem river basin                                                                                                                                                                               |  |       |       |           |                |      |      |             |      |      |      |         |
| L170                                                                                                                                                                                              |  | 87.12 | 49.90 | 0.11±0.02 | cirque-valley  | 2907 | 3189 | 3032        | 44.9 | 30.6 | 0.13 | E, 69   |
| L171                                                                                                                                                                                              |  | 87.11 | 49.91 | 0.21±0.02 | cirque-valley  | 2880 | 3296 | 3077        | 45.9 | 30.8 | 0.25 | E, 79   |
| L172                                                                                                                                                                                              |  | 87.11 | 49.91 | 0.26±0.02 | valley         | 2952 | 3321 | 3097        | 51.9 | 24.1 | 0.29 | E, 99   |
| L173                                                                                                                                                                                              |  | 87.14 | 49.91 | 0.22±0.02 | valley         | 2816 | 3061 | 2955        | 54.6 | 19.8 | 0.23 | W, 251  |
| L174                                                                                                                                                                                              |  | 87.15 | 49.91 | 0.08±0.01 | cirque-valley  | 2805 | 3044 | 2934        | 51.5 | 30.1 | 0.09 | S, 168  |
| L175                                                                                                                                                                                              |  | 87.15 | 49.90 | 0.09±0.01 | cirque-valley  | 2695 | 2954 | 2824        | 52.5 | 34.1 | 0.11 | NE, 50  |
| L176                                                                                                                                                                                              |  | 87.15 | 49.90 | 0.03±0.01 | hanging        | 2746 | 2962 | 2856        | 50.5 | 35.4 | 0.04 | E, 85   |
| L177                                                                                                                                                                                              |  | 87.15 | 49.90 | 0.04±0.01 | cirque         | 2731 | 2966 | 2877        | 53.4 | 33.3 | 0.05 | NE, 48  |
| L178                                                                                                                                                                                              |  | 87.15 | 49.91 | 0.03±0.01 | cirque         | 2860 | 3070 | 2980        | 50.1 | 35.9 | 0.03 | NE, 59  |
| L179                                                                                                                                                                                              |  | 87.15 | 49.91 | 0.02±0.01 | hanging        | 2908 | 3056 | 2985        | 52.8 | 35.9 | 0.03 | E, 95   |
| L180                                                                                                                                                                                              |  | 87.15 | 49.91 | 0.15±0.02 | cirque-valley  | 2761 | 3090 | 2909        | 46.8 | 26.7 | 0.17 | E, 83   |
| L181                                                                                                                                                                                              |  | 87.18 | 49.93 | 0.06±0.01 | hanging        | 2770 | 3176 | 2976        | 61.3 | 40.5 | 0.09 | NE, 55  |
| L182                                                                                                                                                                                              |  | 87.20 | 49.95 | 0.34±0.02 | <b>cirque</b>  | 2750 | 3211 | 2990        | 59.4 | 28.7 | 0.40 | SW, 242 |
| L183                                                                                                                                                                                              |  | 87.20 | 49.94 | 0.67±0.06 | <b>valley</b>  | 2683 | 3394 | <b>2946</b> | 55.9 | 29.9 | 0.80 | W, 263  |
| 173                                                                                                                                                                                               |  | 87.22 | 49.94 | 1.62±0.09 | cirque-valley  | 2656 | 3344 | 2981        | 72.0 | 28.3 | 1.95 | SE, 131 |
| L184                                                                                                                                                                                              |  | 87.23 | 49.94 | 0.02±0.01 | hanging        | 3188 | 3283 | 3241        | 45.3 | 28.3 | 0.02 | SW, 213 |
| L185                                                                                                                                                                                              |  | 87.23 | 49.94 | 0.02±0.01 | hanging        | 3149 | 3300 | 3244        | 39.7 | 27.6 | 0.02 | SW, 216 |
| L186                                                                                                                                                                                              |  | 87.23 | 49.94 | 0.02±0.01 | hanging        | 3146 | 3357 | 3293        | 56.9 | 34.7 | 0.03 | SW, 238 |
| 174                                                                                                                                                                                               |  | 87.25 | 49.94 | 0.16±0.02 | hanging        | 3005 | 3298 | 3138        | 54.9 | 30.9 | 0.19 | S, 173  |
| L187                                                                                                                                                                                              |  | 87.27 | 49.93 | 0.07±0.01 | cirque-hanging | 2631 | 2979 | 2846        | 54.0 | 40.3 | 0.10 | NE, 32  |
| L188                                                                                                                                                                                              |  | 87.27 | 49.93 | 0.18±0.02 | cirque-hanging | 2467 | 2998 | 2780        | 63.4 | 41.6 | 0.25 | NE, 29  |
| L189                                                                                                                                                                                              |  | 87.26 | 49.93 | 0.09±0.01 | cirque-hanging | 2525 | 2983 | 2822        | 56.5 | 39.8 | 0.12 | N, 5    |
| L190                                                                                                                                                                                              |  | 87.26 | 49.93 | 0.10±0.02 | cirque-hanging | 2529 | 3023 | 2890        | 59.8 | 36.3 | 0.13 | NE, 43  |

|         |  |       |       |           |                |      |      |             |      |      |      |         |
|---------|--|-------|-------|-----------|----------------|------|------|-------------|------|------|------|---------|
| L191    |  | 87.26 | 49.94 | 0.08±0.01 | hanging        | 2571 | 3108 | 2859        | 71.6 | 48.6 | 0.12 | NE, 34  |
| L192    |  | 87.25 | 49.94 | 0.21±0.02 | cirque-hanging | 2697 | 3175 | 2968        | 70.6 | 35.9 | 0.27 | NE, 41  |
| L193    |  | 87.25 | 49.94 | 0.07±0.01 | hanging        | 2756 | 3142 | 2997        | 53.7 | 39.4 | 0.10 | N, 7    |
| 175     |  | 87.24 | 49.94 | 0.05±0.01 | hanging        | 3132 | 3295 | 3189        | 49.5 | 24.2 | 0.05 | NE, 30  |
| 176     |  | 87.23 | 49.95 | 1.61±0.10 | cirque         | 2679 | 3410 | 3001        | 74.0 | 29.2 | 1.96 | E, 71   |
| L194    |  | 87.24 | 49.95 | 0.13±0.02 | hanging        | 2858 | 3288 | 3082        | 64.5 | 41.0 | 0.18 | SE, 157 |
| L195    |  | 87.25 | 49.95 | 0.50±0.05 | cirque         | 2687 | 3221 | 2939        | 63.1 | 35.4 | 0.65 | E, 108  |
| L196    |  | 87.28 | 49.96 | 0.09±0.01 | cirque         | 2829 | 3089 | 2941        | 43.0 | 23.8 | 0.10 | S, 181  |
| L197    |  | 87.28 | 49.96 | 0.12±0.01 | cirque         | 2787 | 3173 | 2980        | 59.8 | 34.2 | 0.15 | SE, 139 |
| L198    |  | 87.28 | 49.96 | 0.50±0.04 | valley         | 2754 | 3224 | <b>3024</b> | 69.7 | 30.3 | 0.61 | SE, 126 |
| L199    |  | 87.30 | 49.96 | 0.19±0.02 | cirque-valley  | 2785 | 3083 | 2914        | 61.8 | 30.3 | 0.24 | SE, 125 |
| 178     |  | 87.30 | 49.96 | 1.05±0.07 | cirque         | 2819 | 3344 | 3046        | 57.1 | 25.0 | 1.21 | S, 177  |
| L200    |  | 87.32 | 49.96 | 0.37±0.04 | valley         | 2915 | 3469 | 3199        | 59.7 | 35.7 | 0.47 | SW, 235 |
| L201    |  | 87.32 | 49.96 | 0.05±0.01 | hanging        | 3079 | 3292 | 3195        | 45.6 | 34.0 | 0.05 | SW, 216 |
| L202    |  | 87.33 | 49.95 | 0.02±0.01 | hanging        | 3157 | 3311 | 3262        | 53.1 | 31.2 | 0.02 | SW, 244 |
| L203    |  | 87.33 | 49.95 | 0.02±0.01 | hanging        | 3127 | 3336 | 3245        | 55.4 | 37.4 | 0.03 | SW, 233 |
| L204    |  | 87.32 | 49.95 | 0.02±0.01 | hanging        | 2931 | 3086 | 3021        | 46.1 | 32.1 | 0.03 | N, 351  |
| L205    |  | 87.32 | 49.95 | 0.07±0.01 | hanging        | 2801 | 3157 | 2997        | 56.3 | 41.6 | 0.09 | NW, 327 |
| L206    |  | 87.31 | 49.95 | 0.30±0.03 | cirque-valley  | 2535 | 3283 | 2807        | 62.9 | 36.8 | 0.41 | NW, 336 |
| L207    |  | 87.31 | 49.94 | 0.37±0.03 | hanging        | 2660 | 3428 | 3036        | 61.8 | 35.6 | 0.46 | NW, 304 |
| L208    |  | 87.30 | 49.94 | 0.04±0.01 | hanging        | 2606 | 2937 | 2764        | 49.9 | 36.9 | 0.05 | W, 270  |
| L209    |  | 87.31 | 49.94 | 0.04±0.01 | hanging        | 3035 | 3319 | 3170        | 56.6 | 36.7 | 0.05 | SW, 239 |
| L210    |  | 87.30 | 49.94 | 0.03±0.01 | hanging        | 2644 | 2878 | 2803        | 52.5 | 37.8 | 0.04 | NW, 300 |
| L211    |  | 87.31 | 49.94 | 0.05±0.01 | cirque-hanging | 3003 | 3240 | 3111        | 57.2 | 39.3 | 0.06 | S, 199  |
| L212    |  | 87.33 | 49.93 | 0.15±0.02 | cirque         | 2986 | 3189 | 3108        | 48.6 | 25.8 | 0.17 | W, 270  |
| L213    |  | 87.32 | 49.93 | 0.04±0.01 | cirque-hanging | 2774 | 2963 | 2891        | 56.2 | 32.4 | 0.05 | NW, 295 |
| L214    |  | 87.34 | 49.93 | 0.05±0.01 | hanging        | 2887 | 3183 | 3030        | 51.8 | 31.2 | 0.06 | E, 107  |
| 179     |  | 87.34 | 49.94 | 2.49±0.10 | valley         | 2450 | 3415 | 2706        | 72.0 | 20.9 | 2.85 | E, 79   |
| L215    |  | 87.33 | 49.95 | 0.11±0.02 | cirque-hanging | 2950 | 3292 | 3100        | 63.5 | 36.2 | 0.14 | E, 98   |
| 180-181 |  | 87.34 | 49.96 | 1.55±0.08 | cirque-valley  | 2742 | 3438 | 3102        | 62.0 | 20.5 | 1.69 | SE, 131 |
| 182     |  | 87.35 | 49.97 | 0.64±0.05 | cirque-valley  | 2629 | 3256 | 2911        | 59.2 | 29.0 | 0.76 | E, 107  |

|         |  |       |       |           |                |      |      |      |      |      |      |         |
|---------|--|-------|-------|-----------|----------------|------|------|------|------|------|------|---------|
| L216    |  | 87.39 | 49.96 | 0.04±0.01 | hanging        | 2754 | 2979 | 2887 | 43.5 | 34.5 | 0.04 | E, 77   |
| L217    |  | 87.39 | 49.96 | 0.03±0.01 | hanging        | 2848 | 3049 | 2980 | 47.6 | 33.5 | 0.04 | NE, 44  |
| L218    |  | 87.38 | 49.96 | 0.33±0.03 | valley         | 2698 | 3246 | 2947 | 58.5 | 26.2 | 0.38 | SE, 118 |
| L219    |  | 87.44 | 49.94 | 0.11±0.01 | hanging        | 2610 | 3005 | 2811 | 59.3 | 38.1 | 0.15 | NE, 31  |
| L220    |  | 87.43 | 49.94 | 0.08±0.01 | hanging        | 2622 | 3018 | 2870 | 61.5 | 43.3 | 0.12 | N, 14   |
| L221    |  | 87.43 | 49.94 | 0.25±0.02 | cirque-hanging | 2610 | 3289 | 2988 | 57.5 | 38.6 | 0.33 | N, 13   |
| L222    |  | 87.42 | 49.95 | 0.50±0.04 | cirque-hanging | 2566 | 3306 | 2941 | 54.1 | 34.4 | 0.62 | NE, 41  |
| L223    |  | 87.41 | 49.95 | 0.38±0.05 | hanging        | 2668 | 3191 | 2854 | 60.7 | 34.3 | 0.48 | NE, 23  |
| L224    |  | 87.38 | 49.97 | 0.82±0.06 | cirque-valley  | 2790 | 3305 | 2959 | 64.2 | 23.1 | 0.93 | E, 92   |
| L225    |  | 87.47 | 49.95 | 0.52±0.06 | hanging        | 2566 | 3122 | 2828 | 62.1 | 35.6 | 0.68 | NE, 39  |
| L226    |  | 87.48 | 49.96 | 0.12±0.01 | hanging        | 2539 | 2992 | 2789 | 58.6 | 38.4 | 0.16 | NE, 36  |
| L227    |  | 87.46 | 49.96 | 0.84±0.08 | valley         | 2565 | 3149 | 2818 | 72.0 | 28.0 | 1.04 | NE, 37  |
| L228    |  | 87.45 | 49.97 | 0.84±0.05 | valley         | 2473 | 3083 | 2715 | 66.5 | 28.3 | 1.01 | NE, 42  |
| L229    |  | 87.44 | 49.97 | 0.06±0.02 | hanging        | 2712 | 3109 | 2893 | 57.3 | 36.6 | 0.07 | NE, 33  |
| L230    |  | 87.43 | 49.97 | 0.07±0.01 | hanging        | 2726 | 3071 | 2935 | 62.0 | 36.5 | 0.09 | NE, 49  |
| L231    |  | 87.43 | 49.98 | 0.28±0.03 | valley         | 2574 | 3122 | 2797 | 68.0 | 31.5 | 0.36 | NE, 33  |
| L232    |  | 87.42 | 49.98 | 0.46±0.04 | valley         | 2573 | 3185 | 2831 | 65.5 | 30.3 | 0.58 | NE, 54  |
| L233    |  | 87.42 | 49.99 | 0.17±0.02 | cirque         | 2801 | 3161 | 2992 | 55.3 | 31.6 | 0.20 | NE, 55  |
| 183     |  | 87.42 | 50.00 | 0.52±0.03 | cirque-valley  | 2821 | 3229 | 3004 | 60.6 | 24.5 | 0.59 | E, 108  |
| 184-185 |  | 87.42 | 50.01 | 1.67±0.11 | cirque         | 2762 | 3401 | 3038 | 58.7 | 26.4 | 1.93 | SE, 115 |
| 186     |  | 87.44 | 50.02 | 1.82±0.09 | cirque-valley  | 2626 | 3458 | 3022 | 59.6 | 20.5 | 2.00 | SE, 127 |
| 187-188 |  | 87.45 | 50.02 | 2.68±0.14 | cirque-valley  | 2708 | 3522 | 3079 | 61.9 | 22.7 | 3.27 | S, 159  |
| L234    |  | 87.47 | 50.01 | 0.05±0.01 | hanging        | 2859 | 3191 | 3102 | 60.5 | 31.0 | 0.07 | W, 270  |
| L235    |  | 87.47 | 50.01 | 0.03±0.01 | hanging        | 2893 | 3133 | 3081 | 59.9 | 29.3 | 0.03 | SW, 231 |
| L236    |  | 87.48 | 50.01 | 0.36±0.04 | cirque-valley  | 2693 | 3178 | 2908 | 63.3 | 31.9 | 0.43 | E, 82   |
| L237    |  | 87.48 | 50.02 | 0.54±0.05 | cirque-valley  | 2592 | 3175 | 2855 | 64.6 | 27.0 | 0.64 | E, 86   |
| 189-190 |  | 87.47 | 50.03 | 2.69±0.12 | cirque-valley  | 2614 | 3388 | 2957 | 61.1 | 22.9 | 3.04 | SE, 135 |
| L238    |  | 87.49 | 50.03 | 0.14±0.02 | hanging        | 2915 | 3345 | 3113 | 50.0 | 31.2 | 0.17 | S, 168  |
| 191     |  | 87.50 | 50.03 | 1.42±0.08 | valley         | 2695 | 3486 | 2974 | 55.1 | 23.8 | 1.60 | SE, 127 |
| 192-193 |  | 87.51 | 50.02 | 0.40±0.04 | cirque         | 2762 | 3318 | 2990 | 57.5 | 30.0 | 0.48 | W, 289  |
| L239    |  | 87.51 | 50.02 | 0.28±0.04 | cirque         | 2817 | 3236 | 2982 | 57.9 | 33.3 | 0.35 | NW, 293 |

|      |  |       |       |           |               |      |      |      |      |      |      |         |
|------|--|-------|-------|-----------|---------------|------|------|------|------|------|------|---------|
| 194  |  | 87.51 | 49.99 | 0.33±0.03 | cirque-valley | 2799 | 3362 | 3025 | 52.9 | 30.3 | 0.40 | NW, 336 |
| L240 |  | 87.50 | 49.98 | 0.26±0.05 | cirque        | 2680 | 3337 | 2975 | 61.9 | 34.6 | 0.32 | W, 291  |
| L241 |  | 87.53 | 49.97 | 0.03±0.01 | hanging       | 2722 | 2977 | 2847 | 59.6 | 41.3 | 0.04 | NE, 41  |
| L242 |  | 87.52 | 49.97 | 0.06±0.01 | hanging       | 2764 | 3155 | 2999 | 54.7 | 33.0 | 0.07 | NE, 62  |
| L243 |  | 87.52 | 49.97 | 0.04±0.01 | hanging       | 2792 | 3132 | 3008 | 66.6 | 43.2 | 0.06 | N, 13   |
| L244 |  | 87.52 | 49.97 | 0.03±0.01 | hanging       | 2793 | 3104 | 2979 | 69.4 | 46.3 | 0.04 | N, 14   |
| L245 |  | 87.51 | 49.97 | 0.08±0.01 | cirque        | 2867 | 3087 | 2986 | 47.0 | 30.5 | 0.10 | E, 70   |
| L246 |  | 87.51 | 49.98 | 0.02±0.01 | hanging       | 2964 | 3145 | 3053 | 50.5 | 41.7 | 0.03 | NE, 58  |
| L247 |  | 87.51 | 49.98 | 0.10±0.01 | hanging       | 2825 | 3142 | 2954 | 52.0 | 32.8 | 0.12 | NE, 25  |
| L248 |  | 87.51 | 49.98 | 0.07±0.01 | hanging       | 2852 | 3175 | 2981 | 53.8 | 34.7 | 0.08 | E, 105  |
| L249 |  | 87.54 | 49.98 | 0.10±0.01 | hanging       | 2641 | 2993 | 2814 | 59.3 | 36.4 | 0.13 | N, 10   |
| L250 |  | 87.54 | 49.98 | 0.03±0.01 | hanging       | 2693 | 2973 | 2856 | 53.0 | 41.5 | 0.04 | NE, 31  |
| L251 |  | 87.53 | 49.98 | 0.06±0.01 | hanging       | 2758 | 2982 | 2889 | 47.7 | 36.0 | 0.07 | NE, 33  |
| L252 |  | 87.53 | 49.98 | 0.06±0.01 | cirque        | 2753 | 2964 | 2856 | 69.1 | 34.2 | 0.08 | N, 8    |
| L253 |  | 87.52 | 49.99 | 0.23±0.02 | cirque        | 2831 | 3296 | 3027 | 68.8 | 34.7 | 0.29 | E, 96   |
| L254 |  | 87.52 | 49.99 | 0.28±0.03 | cirque-valley | 2809 | 3183 | 2921 | 61.6 | 22.7 | 0.32 | NE, 57  |
| L255 |  | 87.52 | 50.00 | 0.03±0.01 | hanging       | 2806 | 3060 | 2967 | 63.5 | 36.8 | 0.04 | NE, 44  |
| L256 |  | 87.52 | 50.00 | 0.26±0.03 | cirque        | 2803 | 3253 | 3006 | 62.3 | 33.6 | 0.33 | NE, 59  |
| 195  |  | 87.52 | 50.00 | 0.41±0.03 | cirque        | 2784 | 3212 | 2947 | 54.4 | 22.8 | 0.46 | E, 92   |
| 196  |  | 87.52 | 50.01 | 0.50±0.04 | cirque        | 2864 | 3226 | 2978 | 59.8 | 22.7 | 0.56 | E, 98   |
| L257 |  | 87.56 | 50.00 | 0.35±0.03 | cirque        | 2815 | 3185 | 2993 | 50.0 | 28.1 | 0.41 | SW, 215 |
| L258 |  | 87.58 | 49.97 | 0.04±0.01 | slope         | 3068 | 3151 | 3117 | 27.5 | 13.4 | 0.04 | SW, 245 |
| L259 |  | 87.58 | 49.98 | 0.29±0.03 | slope         | 3135 | 3272 | 3206 | 27.7 | 14.2 | 0.30 | S, 199  |
| L260 |  | 87.59 | 49.97 | 0.23±0.03 | valley        | 2735 | 3160 | 2922 | 58.7 | 29.1 | 0.28 | E, 80   |
| L261 |  | 87.58 | 49.98 | 0.97±0.05 | cirque-valley | 2628 | 3270 | 2910 | 72.8 | 32.5 | 1.22 | NE, 56  |
| 197  |  | 87.57 | 49.99 | 0.81±0.07 | cirque-valley | 2624 | 3250 | 2883 | 65.3 | 30.8 | 0.99 | E, 72   |
| L262 |  | 87.58 | 50.00 | 0.07±0.01 | hanging       | 2596 | 3029 | 2845 | 51.0 | 38.6 | 0.09 | NE, 63  |
| L263 |  | 87.58 | 50.00 | 0.07±0.01 | hanging       | 2699 | 3097 | 2919 | 56.2 | 38.5 | 0.09 | NE, 35  |
| L264 |  | 87.57 | 50.00 | 0.06±0.01 | hanging       | 2806 | 3134 | 3003 | 50.2 | 36.5 | 0.07 | N, 345  |
| L265 |  | 87.55 | 50.00 | 1.40±0.10 | cirque-valley | 2519 | 3196 | 2826 | 65.4 | 28.6 | 1.68 | NE, 40  |
| L266 |  | 87.54 | 50.01 | 0.38±0.03 | valley        | 2740 | 3262 | 2978 | 56.1 | 26.6 | 0.43 | E, 102  |

[illegible]
